# Supplementary material
Source: Research Square preprint supplement (doi:10.21203/rs.3.rs-9912983/v1)
Supplement: Supplementary file 1 [file bc062be3d174340559663c4e.xlsx]

## Sheet: Females-IV_vs_SV
Core enrichment genes associated with the main enriched KEGG pathways identified by GSEA in the contrast between females Infected - vehicle and females Sham-infected - vehicle
Mitochondrial energy metabolism and neurodegenerative diseases
Enriched KEGG pathways - activated: Oxidative phosphorylation pathways; Parkinson's disease
Human gene symbol	M. auratus gene ID	log2 Fold change	P value
ATP12A	ENSMAUG00000020518	0.599081	0.727071
ATP5F1A	ENSMAUG00000019838	0.0495318	0.60441
ATP5F1C	ENSMAUG00000014343	0.0424921	0.715658
ATP5F1D	ENSMAUG00000007050	0.0748886	0.615414
ATP5MC3	ENSMAUG00000017685	0.111993	0.44042
ATP5PB	ENSMAUG00000014472	0.03701	0.687997
ATP5PF	ENSMAUG00000020461	0.101141	0.432303
ATP6AP1	ENSMAUG00000014514	0.0724	0.22347
ATP6V0A1	ENSMAUG00000002684	0.0800724	0.215038
ATP6V0D2	ENSMAUG00000001919	0.511911	0.612755
ATP6V0E1	ENSMAUG00000013929	0.0644937	0.678713
ATP6V0E2	ENSMAUG00000020438	0.0439256	0.623173
ATP6V1B1	ENSMAUG00000018630	1.01966	0.411464
ATP6V1B2	ENSMAUG00000018466	0.0289942	0.656893
ATP6V1C1	ENSMAUG00000018399	0.0460345	0.576284
ATP6V1C2	ENSMAUG00000012261	0.225557	0.490039
ATP6V1D	ENSMAUG00000005008	0.15404	0.109542
ATP6V1E1	ENSMAUG00000010551	0.0893742	0.382906
ATP6V1G2	ENSMAUG00000016081	0.125835	0.162209
ATP6V1G3	ENSMAUG00000018525	0.23794	0.625729
ATP6V1H	ENSMAUG00000000363	0.14064	0.0760592
COX10	ENSMAUG00000002188	0.123152	0.25668
COX4I2	ENSMAUG00000002542	0.35824	0.306409
COX5B	ENSMAUG00000017662	0.0913935	0.595629
COX6B2	ENSMAUG00000015631	0.604466	0.0172757
COX7A1	ENSMAUG00000017861	0.118585	0.649996
COX7A2L	ENSMAUG00000018428	0.0300171	0.802534
COX7B	ENSMAUG00000008542	0.252852	0.0779795
COX8A	ENSMAUG00000015109	0.154895	0.403999
GPR37	ENSMAUG00000012922	0.125272	0.0909001
HTRA2	ENSMAUG00000012010	0.0539766	0.599405
LHPP	ENSMAUG00000008910	0.113775	0.261023
MT-ND4	ENSMAUG00000000028	0.42989	0.00013817
NDUFA1	ENSMAUG00000000368	0.0364977	0.831377
NDUFA10	ENSMAUG00000015249	0.0673762	0.450412
NDUFA3	ENSMAUG00000015459	0.24657	0.422113
NDUFA4	ENSMAUG00000017004	0.12017	0.441132
NDUFA7	ENSMAUG00000011679	0.0956524	0.528772
NDUFA8	ENSMAUG00000016103	0.0292848	0.841217
NDUFB10	ENSMAUG00000007967	0.113159	0.464146
NDUFB3	ENSMAUG00000017559	0.240996	0.119356
NDUFB4	ENSMAUG00000013448	0.185991	0.165262
NDUFB5	ENSMAUG00000017888	0.0750313	0.565066
NDUFC1	ENSMAUG00000017283	0.150914	0.348895
NDUFC2	ENSMAUG00000009562	0.150375	0.405985
NDUFS3	ENSMAUG00000010036	0.032264	0.828795
NDUFS4	ENSMAUG00000008411	0.0552974	0.731101
NDUFS6	ENSMAUG00000011653	0.141353	0.432689
NDUFS8	ENSMAUG00000017880	0.0778542	0.622679
NDUFV2	ENSMAUG00000008707	0.0330537	0.814295
NDUFV3	ENSMAUG00000020188	0.114101	0.412385
PARK7	ENSMAUG00000014799	0.046122	0.797243
PINK1	ENSMAUG00000017256	0.0604046	0.301551
PPA1	ENSMAUG00000008277	0.0782868	0.560793
PPID	ENSMAUG00000010207	0.159896	0.0696335
PRKN	ENSMAUG00000002219	0.134837	0.239882
SDHA	ENSMAUG00000020809	0.0626373	0.406626
SDHB	ENSMAUG00000015748	0.142266	0.199742
SDHD	ENSMAUG00000018722	0.0530054	0.683693
SEPTIN5	ENSMAUG00000014786	0.125261	0.149901
SLC18A1	ENSMAUG00000018163	0.0976095	0.85336
SLC25A31	ENSMAUG00000012426	0.0743874	0.803328
SNCA	ENSMAUG00000018763	0.11572	0.204035
SNCAIP	ENSMAUG00000004463	0.142214	0.356087
TH	ENSMAUG00000018721	0.147991	0.720962
UBA1	ENSMAUG00000012516	0.0450836	0.377682
UBE2G2	ENSMAUG00000022077	0.144391	0.100315
UCHL1	ENSMAUG00000000614	0.0309726	0.765627
UQCRB	ENSMAUG00000017049	0.143156	0.418442
UQCRC1	ENSMAUG00000010209	0.0343892	0.770657
UQCRFS1	ENSMAUG00000016767	0.0271067	0.797654
VDAC1	ENSMAUG00000001063	0.128761	0.103926
VDAC2	ENSMAUG00000006909	0.0949035	0.425347

## Sheet: Females-IB12_vs_IV
										Core enrichment genes associated with the main enriched KEGG pathways identified by GSEA in the contrast between females Infected - B12 and females Infected - vehicle
Mitochondrial energy metabolism and neurodegenerative diseases					Bioenergetic demand					Neuroimmune homeostasis					Neuronal plasticity
Enriched KEGG pathways - inhibited: Alzheimers disease; Citrate cycle, TCA cycle; Fructose and mannose metabolism; Glycolisis gluconeogenesis; Huntingtons disease; Oxidative phosphorylation pathways; Parkinson's disease; Pyruvate metabolism					Enriched KEGG pathways - inhibited: Arachidonic acid metabolism; Arginine and proline metabolism; DNA replication; Fatty acid metabolism; Glutathione metabolism; Pentose phosphate pathway; Perosixome; Phenylalanine metabolism; Propanoate metabolism ;Proteasome; Protein export; Pyrimidine metabolism; Ribosome; RNA polymerase; Spliciosome; Valine, leucine and isoleucine degradation					Enriched KEGG pathways - activated: ECM receptor interaction; Focal adhesion; Hematopoietic cell lineage; JAK-STAT signaling pathway; mTOR signaling pathway; Phosphatidylinositol signaling system; Regulation of actin cytoskeleton. Enriched KEGG pathways - inhibited: Antigen processing and presentation.					Enriched KEGG pathways - activated: Axon guidance; Calcium signaling pathway; ERBB signaling pathway; Long term potentiation
Human gene symbol	M. auratus gene ID	log2 Fold change	P value		Human gene symbol	M. auratus gene ID	log2 Fold change	P value		Human gene symbol	M. auratus gene ID	log2 Fold change	P value		Human gene symbol	M. auratus gene ID	log2 Fold change	P value
ACACA	ENSMAUG00000017414	0.0132347	0.885663		ABAT	ENSMAUG00000006912	-0.00760223	0.922007		ABI2	ENSMAUG00000016724	0.113636	0.266928		ABL1	ENSMAUG00000019708	0.0902862	0.348441
ACAT1	ENSMAUG00000011317	-0.121451	0.220505		ABCD1	ENSMAUG00000020103	-0.105643	0.337379		ACTN2	ENSMAUG00000012948	0.0201672	0.912312		ABL2	ENSMAUG00000013694	0.411277	0.113013
ACO1	ENSMAUG00000021408	-0.036844	0.668838		ABCD4	ENSMAUG00000011789	-0.135799	0.336916		ACTN3	ENSMAUG00000017458	0.0352649	0.916911		ABLIM1	ENSMAUG00000010148	0.440845	0.419617
ACO2	ENSMAUG00000007598	-0.0897502	0.144391		ACAA1	ENSMAUG00000019971	-0.00956118	0.927084		ACTN4	ENSMAUG00000001137	-0.0201758	0.859457		ABLIM2	ENSMAUG00000015012	0.0572126	0.64762
ACSS1	ENSMAUG00000016079	-0.0271317	0.716474		ACAA2	ENSMAUG00000018671	-0.19215	0.214023		AGRN	ENSMAUG00000011047	0.16302	0.289385		ADCY1	ENSMAUG00000011766	0.347525	0.405156
ACSS2	ENSMAUG00000007803	0.00164622	0.990069		ACACA	ENSMAUG00000017414	0.0132347	0.885663		AKT3	ENSMAUG00000016204	0.18196	0.318673		ADCY2	ENSMAUG00000014023	0.00152961	0.978032
ACYP2	ENSMAUG00000006700	-0.127754	0.324208		ACADL	ENSMAUG00000018703	-0.127778	0.140353		ANPEP	ENSMAUG00000010717	0.363382	0.0695177		ADCY3	ENSMAUG00000019311	-0.0113253	0.869526
ADH5	ENSMAUG00000001217	-0.0568201	0.512728		ACADM	ENSMAUG00000000918	-0.215806	0.0554523		APC	ENSMAUG00000013549	0.386987	0.309953		ADCY7	ENSMAUG00000005638	0.0241662	0.849831
AKR1B1	ENSMAUG00000009279	-0.157084	0.187192		ACADS	ENSMAUG00000014711	-0.20264	0.125986		APC2	ENSMAUG00000021769	0.157571	0.240175		ADCY8	ENSMAUG00000014347	0.0567294	0.616608
ALDH1A3	ENSMAUG00000001172	-0.082917	0.567261		ACADSB	ENSMAUG00000005091	-0.0410947	0.593804		ARAF	ENSMAUG00000009999	0.00544117	0.95211		ADCY9	ENSMAUG00000015997	0.0792564	0.571779
ALDH1B1	ENSMAUG00000002155	-0.106925	0.342003		ACADVL	ENSMAUG00000022104	-0.0756059	0.516878		ARHGAP35	ENSMAUG00000000172	0.0312513	0.768729		ADRA1A	ENSMAUG00000019248	0.512118	0.131273
ALDH2	ENSMAUG00000009022	-0.138679	0.187787		ACAT1	ENSMAUG00000011317	-0.121451	0.220505		ARHGAP5	ENSMAUG00000008108	0.219935	0.144199		ADRB2	ENSMAUG00000017373	-0.0283394	0.872467
ALDH3B1	ENSMAUG00000017809	-0.188115	0.30669		ACIN1	ENSMAUG00000000504	-0.044488	0.706213		ARHGEF1	ENSMAUG00000013887	0.184483	0.205553		AKT3	ENSMAUG00000016204	0.18196	0.318673
ALDH7A1	ENSMAUG00000001614	-0.0155552	0.823008		ACOX1	ENSMAUG00000015640	-0.0612777	0.395123		ARHGEF12	ENSMAUG00000013007	0.170401	0.121673		ARHGEF12	ENSMAUG00000013007	0.170401	0.121673
ALDOA	ENSMAUG00000010797	-0.169865	0.0382331		ACOX3	ENSMAUG00000020686	0.0198207	0.813543		ARHGEF6	ENSMAUG00000008083	0.165184	0.325688		ATP2A2	ENSMAUG00000021380	0.108406	0.34342
ALDOB	ENSMAUG00000012988	-0.269437	0.494415		ACSL1	ENSMAUG00000008881	-0.0411468	0.611497		ARHGEF7	ENSMAUG00000017686	0.0253494	0.801715		ATP2A3	ENSMAUG00000005976	0.128875	0.362157
ALDOC	ENSMAUG00000021560	-0.18398	0.110142		ACSL3	ENSMAUG00000012302	-0.041648	0.587032		ARPC5	ENSMAUG00000010810	0.00440212	0.960237		ATP2B1	ENSMAUG00000009310	0.177469	0.185831
AP2M1	ENSMAUG00000021138	-0.123317	0.140643		ACSL5	ENSMAUG00000011709	0.0142779	0.883497		ARPC5L	ENSMAUG00000020262	-0.0111994	0.929932		ATP2B2	ENSMAUG00000009448	0.0812077	0.51097
AP2S1	ENSMAUG00000019505	-0.163453	0.211095		ACSS1	ENSMAUG00000016079	-0.0271317	0.716474		B2M	ENSMAUG00000022234	-0.153352	0.114108		ATP2B3	ENSMAUG00000009992	0.224613	0.262275
ATP5F1C	ENSMAUG00000014343	-0.190297	0.106244		ACSS2	ENSMAUG00000007803	0.00164622	0.990069		BAIAP2	ENSMAUG00000019072	-0.0252673	0.742955		ATP2B4	ENSMAUG00000007564	0.245679	0.220619
ATP5F1D	ENSMAUG00000007050	-0.237732	0.115167		ACSS3	ENSMAUG00000014131	-0.0556235	0.717695		BCL2	ENSMAUG00000010979	0.329601	0.263044		AVPR1B	ENSMAUG00000000787	0.729553	0.638037
ATP5F1E	ENSMAUG00000011798	-0.215363	0.216159		ACY1	ENSMAUG00000009332	-0.213751	0.0677959		BDKRB2	ENSMAUG00000001253	0.0380851	0.953812		BDKRB2	ENSMAUG00000001253	0.0380851	0.953812
ATP5MC3	ENSMAUG00000017685	-0.155342	0.308659		ADH5	ENSMAUG00000001217	-0.0568201	0.512728		BRAF	ENSMAUG00000016066	0.402101	0.128492		BRAF	ENSMAUG00000016066	0.402101	0.128492
ATP5MF	ENSMAUG00000018419	-0.179746	0.269543		AGMAT	ENSMAUG00000022247	-0.196382	0.233163		CAB39	ENSMAUG00000012213	0.116944	0.362452		BST1	ENSMAUG00000009435	0.387614	0.320793
ATP5PB	ENSMAUG00000014472	-0.147409	0.121304		AGXT	ENSMAUG00000009685	-0.416844	0.795655		CALML5	ENSMAUG00000008151	1.34595	0.702643		BTC	ENSMAUG00000000236	0.0513805	0.833745
ATP5PD	ENSMAUG00000000650	-0.222703	0.187327		AK3	ENSMAUG00000008253	-0.130318	0.10411		CALR	ENSMAUG00000018522	-0.282226	0.0323837		CACNA1A	ENSMAUG00000008037	0.0475041	0.624677
ATP5PF	ENSMAUG00000020461	-0.195267	0.119621		ALDH18A1	ENSMAUG00000020691	0.0326105	0.720145		CANX	ENSMAUG00000007570	-0.025791	0.78929		CACNA1B	ENSMAUG00000008461	0.277262	0.107238
ATP6V0E2	ENSMAUG00000020438	-0.142719	0.116458		ALDH1B1	ENSMAUG00000002155	-0.106925	0.342003		CAPN2	ENSMAUG00000012201	0.0793104	0.371826		CACNA1C	ENSMAUG00000017632	0.341786	0.105642
ATP6V1C1	ENSMAUG00000018399	-0.124837	0.096909		ALDH2	ENSMAUG00000009022	-0.138679	0.187787		CBL	ENSMAUG00000022099	0.421755	0.385535		CACNA1D	ENSMAUG00000020160	0.36848	0.0907226
ATP6V1C2	ENSMAUG00000012261	-0.145094	0.643993		ALDH3B1	ENSMAUG00000017809	-0.188115	0.30669		CBLB	ENSMAUG00000008279	0.205551	0.326085		CACNA1E	ENSMAUG00000022174	0.547247	0.115197
ATP6V1D	ENSMAUG00000005008	-0.17828	0.0668072		ALDH4A1	ENSMAUG00000020933	-0.0103839	0.910402		CCND2	ENSMAUG00000016865	0.060023	0.606565		CACNA1G	ENSMAUG00000015351	0.419227	0.132201
ATP6V1E1	ENSMAUG00000010551	-0.140682	0.166462		ALDH6A1	ENSMAUG00000016891	0.013477	0.896961		CD22	ENSMAUG00000020754	4.12322	0.0669098		CACNA1H	ENSMAUG00000017437	0.413772	0.10671
ATP6V1G2	ENSMAUG00000016081	-0.174612	0.0596157		ALDH7A1	ENSMAUG00000001614	-0.0155552	0.823008		CD3E	ENSMAUG00000009806	3.00623	0.0407689		CACNA1I	ENSMAUG00000008968	0.235209	0.211252
ATP6V1H	ENSMAUG00000000363	-0.116177	0.128841		ALDOA	ENSMAUG00000010797	-0.169865	0.0382331		CD3G	ENSMAUG00000008447	2.86165	0.367191		CACNA1S	ENSMAUG00000004666	0.300764	0.396328
BAD	ENSMAUG00000013587	-0.192783	0.111103		ALDOB	ENSMAUG00000012988	-0.269437	0.494415		CD4	ENSMAUG00000008564	0.233097	0.438686		CALM1	ENSMAUG00000022230	-0.000162595	0.99844
BAX	ENSMAUG00000015297	-0.232162	0.193066		ALDOC	ENSMAUG00000021560	-0.18398	0.110142		CD44	ENSMAUG00000004546	0.210404	0.0346692		CALML5	ENSMAUG00000008151	1.34595	0.702643
BBC3	ENSMAUG00000009202	-0.157965	0.441988		ALOX12B	ENSMAUG00000010342	-0.511012	0.686873		CD47	ENSMAUG00000009968	0.182765	0.303108		CAMK2A	ENSMAUG00000019808	0.100757	0.50334
BPGM	ENSMAUG00000012021	-0.0638742	0.484567		ALYREF	ENSMAUG00000020552	-0.167784	0.298088		CD5	ENSMAUG00000011872	0.383503	0.547777		CAMK4	ENSMAUG00000020936	0.303813	0.0868089
CDK5	ENSMAUG00000016278	-0.149531	0.074283		AMACR	ENSMAUG00000007641	-0.0834422	0.596203		CD74	ENSMAUG00000013840	1.39031	0.561195		CBL	ENSMAUG00000022099	0.421755	0.385535
CLTA	ENSMAUG00000019878	-0.170217	0.220541		AOC3	ENSMAUG00000010190	-0.33411	0.19987		CD8A	ENSMAUG00000015863	-0.0895487	0.858378		CBLB	ENSMAUG00000008279	0.205551	0.326085
COX17	ENSMAUG00000020841	-0.208595	0.343239		ASL	ENSMAUG00000007361	-0.0493515	0.676496		CDS2	ENSMAUG00000000153	0.94762	0.430853		CD38	ENSMAUG00000010213	0.0197919	0.881038
COX4I1	ENSMAUG00000008155	-0.217858	0.168356		ASS1	ENSMAUG00000013037	-0.103621	0.737966		CFL2	ENSMAUG00000011457	0.343529	0.112898		CHRM2	ENSMAUG00000003440	0.306292	0.194824
COX4I2	ENSMAUG00000002542	-0.386866	0.285108		AUH	ENSMAUG00000009561	-0.159502	0.232353		CHRM2	ENSMAUG00000000736	0.00282544	0.980082		CHRM3	ENSMAUG00000006959	-0.0100855	0.940206
COX5B	ENSMAUG00000017662	-0.238458	0.166528		AZIN2	ENSMAUG00000000371	-0.174289	0.194245		CHRM3	ENSMAUG00000003440	0.306292	0.194824		CHRM5	ENSMAUG00000021233	0.0861522	0.676547
COX6B1	ENSMAUG00000011240	-0.266741	0.0762316		BAAT	ENSMAUG00000009479	-0.0534817	0.831913		CHRM5	ENSMAUG00000006959	-0.0100855	0.940206		CREBBP	ENSMAUG00000010329	0.217319	0.179202
COX6B2	ENSMAUG00000015631	-0.319454	0.266903		BCAS2	ENSMAUG00000013855	-0.116157	0.310143		CLCF1	ENSMAUG00000017012	0.110201	0.674321		CRK	ENSMAUG00000020949	0.0668617	0.446614
COX7A1	ENSMAUG00000017861	-0.299749	0.270553		BCAT2	ENSMAUG00000005902	-0.173938	0.158221		COL11A1	ENSMAUG00000013059	0.0342815	0.86419		CRKL	ENSMAUG00000016703	0.104819	0.450592
COX7A2	ENSMAUG00000008392	-0.295777	0.100393		BCKDHA	ENSMAUG00000015176	-0.0158626	0.883151		COL11A2	ENSMAUG00000021348	0.105616	0.48507		CXCR4	ENSMAUG00000017285	0.0880041	0.505701
COX7A2L	ENSMAUG00000018428	-0.187256	0.121847		BCKDHB	ENSMAUG00000004890	-0.161401	0.259879		COL4A1	ENSMAUG00000021359	0.0308041	0.867562		CYSLTR1	ENSMAUG00000016351	0.274027	0.600123
COX7B	ENSMAUG00000008542	-0.345455	0.0207106		BUD31	ENSMAUG00000016405	-0.204237	0.158187		COL4A2	ENSMAUG00000020267	0.100209	0.662646		DCC	ENSMAUG00000009021	0.303925	0.214234
COX8A	ENSMAUG00000015109	-0.29107	0.120534		CAD	ENSMAUG00000003111	0.0267969	0.83843		COL4A6	ENSMAUG00000001918	0.100593	0.765281		EDNRA	ENSMAUG00000016677	0.14064	0.603721
CREB3L1	ENSMAUG00000003224	-0.209177	0.155466		CANT1	ENSMAUG00000012573	-0.153743	0.124574		COL5A1	ENSMAUG00000011031	0.233312	0.324394		EDNRB	ENSMAUG00000014682	0.181925	0.235027
CREB3L3	ENSMAUG00000020928	-0.15903	0.377737		CAT	ENSMAUG00000012493	-0.0364935	0.621555		COL5A3	ENSMAUG00000006118	0.202313	0.191124		EFNA5	ENSMAUG00000016198	0.216385	0.276746
CREB3L4	ENSMAUG00000007210	-2.08019	0.122427		CBR1	ENSMAUG00000000721	-0.215478	0.25315		COL6A2	ENSMAUG00000022073	0.0550407	0.7479		EGFR	ENSMAUG00000000581	0.126963	0.376827
CS	ENSMAUG00000020525	-0.11088	0.0949475		CBR3	ENSMAUG00000000128	-0.225327	0.227994		COL6A3	ENSMAUG00000018474	0.142233	0.400794		EP300	ENSMAUG00000004380	0.181173	0.179878
CYC1	ENSMAUG00000011170	-0.202751	0.128196		CCDC12	ENSMAUG00000008879	-0.121199	0.55964		COL6A6	ENSMAUG00000011745	0.123635	0.845505		EPHA3	ENSMAUG00000011923	0.185865	0.3943
DLAT	ENSMAUG00000014831	0.000274696	0.997172		CDA	ENSMAUG00000017832	-0.0430389	0.911765		CR2	ENSMAUG00000009890	0.410394	0.575495		EPHA4	ENSMAUG00000004413	0.147918	0.352242
DLD	ENSMAUG00000015436	-0.0108695	0.882862		CDC5L	ENSMAUG00000013120	-0.0918647	0.300985		CREBBP	ENSMAUG00000010329	0.217319	0.179202		EPHA5	ENSMAUG00000007678	0.195306	0.127326
DLST	ENSMAUG00000000864	-0.0551431	0.494389		CHERP	ENSMAUG00000015856	-0.0108395	0.922941		CRK	ENSMAUG00000020949	0.0668617	0.446614		EPHA6	ENSMAUG00000005573	0.396963	0.248102
ENO2	ENSMAUG00000015278	-0.0979511	0.141935		CKB	ENSMAUG00000012909	-0.193172	0.0810581		CRKL	ENSMAUG00000016703	0.104819	0.450592		EPHA7	ENSMAUG00000000040	0.171325	0.25575
ENO3	ENSMAUG00000014129	-0.298877	0.249576		CKM	ENSMAUG00000009932	-0.139264	0.639039		CSF2	ENSMAUG00000009251	1.43575	0.683368		EPHA8	ENSMAUG00000021011	0.293991	0.22103
FBP2	ENSMAUG00000017596	-0.392724	0.144024		CKMT2	ENSMAUG00000008773	-0.0645453	0.935877		CSF3	ENSMAUG00000021722	0.573055	0.705038		EPHB3	ENSMAUG00000012646	0.156619	0.170632
FH	ENSMAUG00000003139	-0.0987733	0.334253		CMPK2	ENSMAUG00000017501	-0.0861679	0.409284		CSF3R	ENSMAUG00000001404	0.366682	0.328144		EPHB6	ENSMAUG00000014846	0.0921484	0.35419
FPGT	ENSMAUG00000014513	-0.0524135	0.670061		CPS1	ENSMAUG00000010923	-0.0822025	0.759854		CTSB	ENSMAUG00000021558	-0.0860461	0.22874		ERBB2	ENSMAUG00000021280	0.203194	0.405392
G6PC1	ENSMAUG00000002100	-0.590173	0.449503		CPT1C	ENSMAUG00000015570	-0.115728	0.203547		CTSS	ENSMAUG00000021301	-0.182951	0.223649		ERBB3	ENSMAUG00000015213	0.0749071	0.52046
GALM	ENSMAUG00000017085	-0.0657714	0.582348		CPT2	ENSMAUG00000018605	-0.244993	0.0386208		CYFIP1	ENSMAUG00000012507	0.147543	0.235108		ERBB4	ENSMAUG00000021336	0.512101	0.0121078
GAPDH	ENSMAUG00000001414	-0.22034	0.0265241		CROT	ENSMAUG00000005063	0.00948601	0.916389		CYFIP2	ENSMAUG00000011538	0.0807602	0.496981		EREG	ENSMAUG00000013943	1.00666	0.468767
GFUS	ENSMAUG00000011454	-0.0827244	0.469308		CTNNBL1	ENSMAUG00000000654	-0.139185	0.326142		DAG1	ENSMAUG00000009208	0.0452925	0.661078		F2R	ENSMAUG00000010556	0.12114	0.358984
GMDS	ENSMAUG00000011976	-0.130717	0.410447		CTPS1	ENSMAUG00000020664	0.0131294	0.852817		DGKB	ENSMAUG00000014209	0.184028	0.422877		GAB1	ENSMAUG00000009430	0.0993972	0.514797
GMPPB	ENSMAUG00000020162	-0.379917	0.134133		CTPS2	ENSMAUG00000017364	-0.107248	0.328468		DGKD	ENSMAUG00000013820	0.0700367	0.461086		GNA14	ENSMAUG00000010242	0.0529582	0.785836
GPI	ENSMAUG00000014174	-0.107648	0.209741		CWC15	ENSMAUG00000011686	-0.18175	0.212584		DGKE	ENSMAUG00000020629	0.328685	0.218088		GNAL	ENSMAUG00000017689	0.106075	0.400649
GRHPR	ENSMAUG00000011406	-0.0640609	0.704892		CYP2E1	ENSMAUG00000001706	-1.48761	0.655991		DGKG	ENSMAUG00000006899	0.0798279	0.589139		GRIA1	ENSMAUG00000022238	0.160958	0.204513
HAGH	ENSMAUG00000012144	-0.0842035	0.361165		DBT	ENSMAUG00000009415	0.0116927	0.915867		DGKH	ENSMAUG00000017457	0.760882	0.0700644		GRIA2	ENSMAUG00000015836	0.229912	0.117578
HAGHL	ENSMAUG00000008661	0.00623733	0.96921		DCTD	ENSMAUG00000015286	-0.361542	0.598755		DGKI	ENSMAUG00000010418	0.568208	0.181802		GRIN1	ENSMAUG00000019825	0.103748	0.397373
HK1	ENSMAUG00000003378	-0.0417429	0.495029		DDX23	ENSMAUG00000012336	-0.0497914	0.53237		DGKQ	ENSMAUG00000008006	0.169158	0.310102		GRIN2A	ENSMAUG00000009472	0.58247	0.177842
IDH2	ENSMAUG00000019935	-0.0711285	0.542908		DDX39B	ENSMAUG00000008059	-0.0926566	0.326766		DIAPH1	ENSMAUG00000013628	-0.0190523	0.838448		GRIN2B	ENSMAUG00000010364	0.571747	0.0191419
IDH3B	ENSMAUG00000020105	-0.0470954	0.566943		DDX5	ENSMAUG00000008696	-0.011279	0.850316		DIAPH2	ENSMAUG00000000817	0.409885	0.0880707		GRIN2C	ENSMAUG00000019504	0.0386038	0.608894
KHK	ENSMAUG00000013515	-0.0425836	0.776848		DECR2	ENSMAUG00000015925	-0.0921636	0.464537		DIAPH3	ENSMAUG00000015519	0.114014	0.729027		GRIN2D	ENSMAUG00000015271	0.0801982	0.458394
LDHB	ENSMAUG00000008520	-0.167258	0.205744		DERA	ENSMAUG00000014612	-0.186051	0.267245		DOCK1	ENSMAUG00000003941	0.349014	0.0668884		GRM1	ENSMAUG00000003741	0.273949	0.281277
LDHD	ENSMAUG00000022265	-0.227802	0.0720837		DHODH	ENSMAUG00000005725	-0.0244635	0.865875		EGFR	ENSMAUG00000000581	0.126963	0.376827		GRM5	ENSMAUG00000001190	0.322663	0.109076
LHPP	ENSMAUG00000008910	-0.206597	0.0437388		DHX8	ENSMAUG00000019891	-0.0554143	0.539018		EIF4B	ENSMAUG00000003345	-0.0443907	0.798441		GRPR	ENSMAUG00000020061	0.219009	0.634655
MAPK3	ENSMAUG00000012073	-0.168149	0.0962626		DLD	ENSMAUG00000015436	-0.0108695	0.882862		ENAH	ENSMAUG00000018343	0.11958	0.280812		GSK3B	ENSMAUG00000015683	0.291774	0.174914
MDH1	ENSMAUG00000018086	-0.0964346	0.287246		DPYS	ENSMAUG00000016256	-0.217268	0.55968		EP300	ENSMAUG00000017836	0.18035	0.0853055		HBEGF	ENSMAUG00000013217	-0.112237	0.260126
ME1	ENSMAUG00000010558	-0.109966	0.254691		DTYMK	ENSMAUG00000000268	-0.281948	0.101518		ERBB2	ENSMAUG00000004380	0.181173	0.179878		HRH1	ENSMAUG00000001210	0.0931963	0.586457
ME2	ENSMAUG00000008737	0.0137738	0.944896		DUT	ENSMAUG00000000956	-0.212651	0.235177		EZR	ENSMAUG00000007375	0.0752985	0.464686		HRH2	ENSMAUG00000009874	0.253174	0.148667
MPI	ENSMAUG00000013553	-0.0750219	0.41045		ECH1	ENSMAUG00000016635	-0.127999	0.285215		F2R	ENSMAUG00000010556	0.12114	0.358984		HTR2A	ENSMAUG00000008111	0.13034	0.36313
MT-ND4	ENSMAUG00000000028	-0.338936	0.00564042		ECHS1	ENSMAUG00000020964	-0.146038	0.144179		FGD1	ENSMAUG00000014883	0.104599	0.381724		HTR2B	ENSMAUG00000011880	0.0370642	0.80754
MTMR7	ENSMAUG00000009197	-0.0926286	0.330241		ECI1	ENSMAUG00000015027	-0.0315427	0.829015		FGD3	ENSMAUG00000008383	0.020321	0.839596		HTR2C	ENSMAUG00000015125	1.44698	0.04444
NDUFA1	ENSMAUG00000000368	-0.165854	0.332336		EHHADH	ENSMAUG00000004866	-0.0936082	0.431675		FGF1	ENSMAUG00000011876	-0.00749954	0.943326		HTR4	ENSMAUG00000006143	0.209943	0.317822
NDUFA10	ENSMAUG00000015249	-0.201622	0.0319485		EIF4A3	ENSMAUG00000012955	-0.124697	0.250995		FGF12	ENSMAUG00000009873	0.0916753	0.347939		HTR5A	ENSMAUG00000001772	0.0188237	0.841544
NDUFA2	ENSMAUG00000015843	-0.147133	0.375615		ENTPD1	ENSMAUG00000001755	-0.0745251	0.509091		FGF13	ENSMAUG00000008666	0.100949	0.515105		HTR7	ENSMAUG00000008537	0.0327614	0.761032
NDUFA3	ENSMAUG00000015459	-0.482724	0.134365		ENTPD6	ENSMAUG00000001297	-0.0327779	0.692248		FGF14	ENSMAUG00000006812	0.204447	0.255655		ITPKB	ENSMAUG00000013424	0.0112255	0.892415
NDUFA4	ENSMAUG00000017004	-0.292739	0.0633039		EPHX2	ENSMAUG00000010745	-0.00509981	0.963577		FGF17	ENSMAUG00000014970	-0.000499197	0.99901		ITPR1	ENSMAUG00000016842	0.186393	0.219749
NDUFA7	ENSMAUG00000011679	-0.330995	0.0360043		FAU	ENSMAUG00000014406	-0.198737	0.23896		FGF19	ENSMAUG00000018536	0.124729	0.830145		ITPR2	ENSMAUG00000012727	0.316934	0.0884633
NDUFA8	ENSMAUG00000016103	-0.148826	0.316399		FBP2	ENSMAUG00000017596	-0.392724	0.144024		FGF2	ENSMAUG00000014645	0.464527	0.192716		ITPR3	ENSMAUG00000019945	0.175504	0.247437
NDUFA9	ENSMAUG00000000394	-0.119822	0.179017		FEN1	ENSMAUG00000012401	-0.229166	0.260462		FGF20	ENSMAUG00000011090	-0.0363847	0.971183		KRAS	ENSMAUG00000017232	0.15624	0.177793
NDUFB10	ENSMAUG00000007967	-0.208385	0.190541		G6PD	ENSMAUG00000008547	-0.0763868	0.41505		FGF21	ENSMAUG00000016333	0.121117	0.873405		L1CAM	ENSMAUG00000008575	0.0790031	0.373652
NDUFB3	ENSMAUG00000017559	-0.28302	0.0635032		GAMT	ENSMAUG00000002429	-0.169098	0.238353		FGF23	ENSMAUG00000008954	0.722293	0.634275		LHCGR	ENSMAUG00000007411	0.758659	0.388376
NDUFB4	ENSMAUG00000013448	-0.298172	0.0307461		GATM	ENSMAUG00000003375	-0.0095494	0.917435		FGF3	ENSMAUG00000017622	0.265881	0.843123		LTB4R2	ENSMAUG00000006293	0.832679	0.126584
NDUFB5	ENSMAUG00000017888	-0.277851	0.034848		GCDH	ENSMAUG00000012276	-0.022285	0.842855		FGF5	ENSMAUG00000016825	0.134648	0.739574		MAP2K4	ENSMAUG00000021520	0.164011	0.233801
NDUFB8	ENSMAUG00000020368	-0.21055	0.135503		GCLM	ENSMAUG00000014976	-0.219932	0.0156215		FGF7	ENSMAUG00000013683	0.554464	0.644907		MAPK10	ENSMAUG00000017023	0.0771885	0.590226
NDUFB9	ENSMAUG00000013523	-0.168895	0.242229		GGCT	ENSMAUG00000016279	-0.254588	0.100824		FGF9	ENSMAUG00000019224	0.0342967	0.731276		MAPK8	ENSMAUG00000006379	0.0504747	0.522062
NDUFC1	ENSMAUG00000017283	-0.31446	0.0557088		GGT7	ENSMAUG00000013174	-0.0631631	0.540601		FGFR1	ENSMAUG00000018100	0.0802443	0.486764		MAPK9	ENSMAUG00000017175	0.0515124	0.478517
NDUFC2	ENSMAUG00000009562	-0.235711	0.207554		GLS2	ENSMAUG00000019243	0.0194845	0.888857		FGFR2	ENSMAUG00000012248	0.0726027	0.455153		MET	ENSMAUG00000012960	0.19298	0.234445
NDUFS3	ENSMAUG00000010036	-0.218105	0.154825		GLUL	ENSMAUG00000019075	-0.0927304	0.307061		FGFR3	ENSMAUG00000012735	0.101653	0.274111		MTOR	ENSMAUG00000015520	0.114299	0.245443
NDUFS4	ENSMAUG00000008411	-0.178607	0.292069		GNPAT	ENSMAUG00000021271	-0.0559661	0.471593		FLNA	ENSMAUG00000013774	0.0347224	0.806589		MYLK2	ENSMAUG00000011764	1.58813	0.433591
NDUFS5	ENSMAUG00000017342	-0.318695	0.0807801		GOT1	ENSMAUG00000017853	-0.149188	0.0820833		FLNB	ENSMAUG00000013744	0.243917	0.177463		NCK1	ENSMAUG00000019520	0.0972173	0.425289
NDUFS6	ENSMAUG00000011653	-0.269423	0.139488		GOT2	ENSMAUG00000018221	-0.179762	0.0621437		FLNC	ENSMAUG00000020611	0.0603355	0.857509		NCK2	ENSMAUG00000018229	0.0722817	0.561083
NDUFS7	ENSMAUG00000021038	-0.183567	0.183984		GPI	ENSMAUG00000014174	-0.107648	0.209741		FLT1	ENSMAUG00000006859	0.0940503	0.330913		NFAT5	ENSMAUG00000014930	0.552918	0.143965
NDUFS8	ENSMAUG00000017880	-0.216826	0.174815		GPX1	ENSMAUG00000014429	-0.172096	0.537706		FLT3	ENSMAUG00000011952	0.106309	0.3975		NFATC2	ENSMAUG00000011773	0.203457	0.36467
NDUFV2	ENSMAUG00000008707	-0.216717	0.124419		GPX2	ENSMAUG00000020984	-1.23356	0.478777		FLT4	ENSMAUG00000014271	0.0589654	0.759382		NFATC3	ENSMAUG00000014488	0.431917	0.121473
NDUFV3	ENSMAUG00000020188	-0.226169	0.10997		GPX3	ENSMAUG00000002070	-0.338079	0.0643856		GIT1	ENSMAUG00000017744	-0.00655785	0.941563		NFATC4	ENSMAUG00000012664	0.224464	0.588396
OGDH	ENSMAUG00000021826	-0.0298099	0.630907		GPX4	ENSMAUG00000016769	-0.257623	0.0850383		GNA13	ENSMAUG00000007230	0.115979	0.192506		NOS2	ENSMAUG00000016350	0.00599766	0.982291
OGDHL	ENSMAUG00000000353	0.0043431	0.955273		GPX7	ENSMAUG00000016553	-0.410552	0.061882		GNG12	ENSMAUG00000015778	0.113352	0.482766		NRG1	ENSMAUG00000022160	0.112597	0.71723
PARK7	ENSMAUG00000014799	-0.230445	0.213121		GSR	ENSMAUG00000013110	-0.0836892	0.39258		GP5	ENSMAUG00000009611	0.462155	0.575301		NRG2	ENSMAUG00000010710	0.262563	0.197631
PC	ENSMAUG00000017333	-0.00604409	0.913025		GSS	ENSMAUG00000018706	-0.225234	0.072574		GP6	ENSMAUG00000022015	4.90514	0.00330406		NRG3	ENSMAUG00000011497	0.0975728	0.342285
PCK1	ENSMAUG00000020497	-1.35241	0.434016		GSTK1	ENSMAUG00000009165	-0.100351	0.363201		GP9	ENSMAUG00000009649	3.67965	0.18829		NRG4	ENSMAUG00000014620	1.45425	0.677854
PCK2	ENSMAUG00000013705	-0.0357611	0.734733		GSTM2	ENSMAUG00000009031	-0.195413	0.134647		GSK3B	ENSMAUG00000015683	0.291774	0.174914		NRP1	ENSMAUG00000006089	0.139537	0.461642
PDHA1	ENSMAUG00000002413	0.0260925	0.76417		GSTM3	ENSMAUG00000002679	-0.187799	0.108881		HGF	ENSMAUG00000007722	0.0801571	0.59399		NTN3	ENSMAUG00000018074	0.202808	0.295402
PDHB	ENSMAUG00000004888	-0.134973	0.196743		GSTM4	ENSMAUG00000014787	-0.102877	0.17813		HIF1A	ENSMAUG00000020008	0.207082	0.352587		NTN4	ENSMAUG00000004210	0.0651614	0.570518
PFKFB1	ENSMAUG00000018425	-0.122782	0.436452		GSTO1	ENSMAUG00000013312	-0.112953	0.379932		HLA-DMA	ENSMAUG00000000861	-0.108929	0.494754		OXTR	ENSMAUG00000020582	0.0404003	0.830773
PFKFB4	ENSMAUG00000015017	-0.036712	0.770862		GSTP1	ENSMAUG00000017855	-0.147618	0.298831		HLA-DMB	ENSMAUG00000008923	-0.0468787	0.878034		P2RX2	ENSMAUG00000011915	0.355223	0.664486
PFKL	ENSMAUG00000017741	-0.0866028	0.320532		GSTZ1	ENSMAUG00000011527	-0.101568	0.352133		HLA-DOA	ENSMAUG00000014005	-0.108679	0.776957		P2RX5	ENSMAUG00000008683	0.833971	0.362448
PFKM	ENSMAUG00000016492	-0.0509591	0.388826		HACL1	ENSMAUG00000006318	-0.00566602	0.969596		HLA-DOB	ENSMAUG00000007698	-0.929267	0.68519		P2RX6	ENSMAUG00000007491	0.00409757	0.977184
PFKP	ENSMAUG00000014078	-0.0496732	0.463615		HADH	ENSMAUG00000015697	-0.0474198	0.62679		HLA-DRA	ENSMAUG00000014504	-0.00778535	0.986707		PAK2	ENSMAUG00000021281	0.0717178	0.505287
PGAM4	ENSMAUG00000015229	-0.142599	0.0467769		HADHA	ENSMAUG00000004383	-0.136749	0.0740601		HMMR	ENSMAUG00000015482	0.044322	0.777312		PAK3	ENSMAUG00000008848	0.155078	0.161563
PGK1	ENSMAUG00000014623	-0.0770524	0.146421		HADHB	ENSMAUG00000007811	-0.0940823	0.276573		HSP90AB1	ENSMAUG00000018422	-0.0278271	0.679776		PDE1A	ENSMAUG00000018687	0.25515	0.102274
PGK2	ENSMAUG00000017658	-1.41741	0.687811		HIBCH	ENSMAUG00000008623	-0.118158	0.225649		HSPA1L	ENSMAUG00000015361	-0.00918499	0.920657		PDE1C	ENSMAUG00000013839	0.278897	0.152507
PGM1	ENSMAUG00000000807	-0.13791	0.132285		HMGCS1	ENSMAUG00000000052	-0.0368252	0.494654		HSPA2	ENSMAUG00000003987	-0.0987654	0.340559		PDGFRA	ENSMAUG00000018986	0.102566	0.284833
PGM2	ENSMAUG00000009577	-0.132945	0.272912		HMGCS2	ENSMAUG00000019983	0.0248287	0.941534		HSPA4	ENSMAUG00000009192	0.00248941	0.979042		PDGFRB	ENSMAUG00000012051	0.0438066	0.633798
PHPT1	ENSMAUG00000016521	-0.0875119	0.605763		HNRNPM	ENSMAUG00000017476	-0.0518939	0.603752		HSPA5	ENSMAUG00000016779	-0.200437	0.0994961		PHKA1	ENSMAUG00000008738	0.10245	0.429344
PKLR	ENSMAUG00000012808	-0.126942	0.920675		HPD	ENSMAUG00000020882	-1.67628	0.216522		HSPG2	ENSMAUG00000009979	0.147802	0.285111		PHKA2	ENSMAUG00000001285	0.150949	0.404086
PMM1	ENSMAUG00000014845	-0.146225	0.185959		HPGDS	ENSMAUG00000000292	-0.358978	0.35762		IBSP	ENSMAUG00000016877	0.767858	0.457067		PHKB	ENSMAUG00000016799	0.0315738	0.699556
PMM2	ENSMAUG00000008157	-0.09214	0.243053		HSD17B10	ENSMAUG00000012984	-0.112719	0.491212		IFI30	ENSMAUG00000016704	-0.316073	0.0975381		PHKG1	ENSMAUG00000001041	0.00866411	0.949789
POLR2F	ENSMAUG00000018586	-0.335105	0.0561669		HSD17B4	ENSMAUG00000011187	-0.0205725	0.844239		IFNAR1	ENSMAUG00000014001	0.0619734	0.665388		PHKG2	ENSMAUG00000009091	0.0793565	0.624965
POLR2K	ENSMAUG00000010288	-0.334086	0.0384198		HSPA1L	ENSMAUG00000015361	-0.00918499	0.920657		IGF1	ENSMAUG00000020849	0.41274	0.0513003		PIK3CA	ENSMAUG00000019874	0.0748318	0.340457
POLR2L	ENSMAUG00000019023	-0.350005	0.100915		HSPA2	ENSMAUG00000003987	-0.0987654	0.340559		IGF1R	ENSMAUG00000010750	0.353372	0.129405		PIK3CG	ENSMAUG00000000671	0.252345	0.0834099
PPA1	ENSMAUG00000008277	-0.194208	0.177948		HSPA5	ENSMAUG00000016779	-0.200437	0.0994961		IL10RA	ENSMAUG00000019337	0.0680125	0.65702		PIK3R1	ENSMAUG00000008232	0.0700548	0.356301
PSENEN	ENSMAUG00000011553	-0.174663	0.216413		IDH2	ENSMAUG00000019935	-0.0711285	0.542908		IL11	ENSMAUG00000011999	0.834772	0.256945		PIK3R3	ENSMAUG00000002444	0.12828	0.427089
SDHA	ENSMAUG00000020809	-0.0475083	0.544188		IL4I1	ENSMAUG00000014929	-0.141982	0.499921		IL12RB2	ENSMAUG00000012848	0.600493	0.00120651		PIK3R5	ENSMAUG00000020086	0.485537	0.0632081
SDHB	ENSMAUG00000015748	-0.182382	0.107302		IMMP1L	ENSMAUG00000010566	-0.18222	0.466575		IL13RA1	ENSMAUG00000018547	0.264485	0.0847368		PLCB1	ENSMAUG00000015228	0.172512	0.345382
SDHC	ENSMAUG00000010714	-0.0435198	0.610697		ISY1	ENSMAUG00000008793	-0.104641	0.340146		IL13RA2	ENSMAUG00000014963	0.634676	0.670291		PLCB2	ENSMAUG00000006285	0.126515	0.346588
SDHD	ENSMAUG00000018722	-0.188373	0.15054		ITPA	ENSMAUG00000021384	-0.142695	0.298947		IL1B	ENSMAUG00000017477	1.21057	0.133999		PLCB4	ENSMAUG00000012557	0.0735681	0.593667
SEPTIN5	ENSMAUG00000014786	-0.178879	0.0574207		IVD	ENSMAUG00000021346	-0.0495317	0.623889		IL20RA	ENSMAUG00000009539	0.639529	0.207207		PLCD3	ENSMAUG00000001235	0.20706	0.138871
SLC25A5	ENSMAUG00000020049	-0.156744	0.267123		LAP3	ENSMAUG00000014239	0.0270974	0.742538		IL22	ENSMAUG00000012042	1.43575	0.683368		PLCE1	ENSMAUG00000003152	0.170249	0.180726
SNCA	ENSMAUG00000018763	-0.125054	0.16991		LDHB	ENSMAUG00000008520	-0.167258	0.205744		IL22RA2	ENSMAUG00000009499	2.76582	0.0147197		PLCG1	ENSMAUG00000001300	0.0116129	0.903277
SOD1	ENSMAUG00000018610	-0.17204	0.344333		LIG1	ENSMAUG00000012577	0.00907739	0.907808		IL2RA	ENSMAUG00000020337	2.22896	0.18035		PLCG2	ENSMAUG00000007620	-0.00453746	0.97731
SORD	ENSMAUG00000001896	-0.0385875	0.679543		LSM2	ENSMAUG00000021966	-0.458502	0.0406418		IL2RB	ENSMAUG00000018127	3.18182	0.0266112		PLN	ENSMAUG00000007750	0.0807301	0.897274
SUCLA2	ENSMAUG00000008374	-0.00188786	0.979817		LSM6	ENSMAUG00000014938	-0.219233	0.224175		IL2RG	ENSMAUG00000011396	1.75084	0.231294		PLXNA1	ENSMAUG00000014014	0.183749	0.392943
SUCLG1	ENSMAUG00000020136	-0.160355	0.132323		LSM7	ENSMAUG00000009276	-0.138661	0.520358		IL4	ENSMAUG00000009458	0.685457	0.299813		PLXNA2	ENSMAUG00000016643	0.192285	0.187901
SUCLG2	ENSMAUG00000021321	-0.105192	0.388091		LSM8	ENSMAUG00000015356	-0.0992387	0.632247		IL6	ENSMAUG00000017531	0.592092	0.54345		PLXNB1	ENSMAUG00000012722	0.141056	0.271137
TGM2	ENSMAUG00000016456	-0.142955	0.486686		LTC4S	ENSMAUG00000004203	-0.202539	0.521961		IL6R	ENSMAUG00000011038	0.11125	0.470707		PLXNB2	ENSMAUG00000012310	0.091992	0.163859
TH	ENSMAUG00000018721	-0.353885	0.46415		MAGOH	ENSMAUG00000016008	-0.0810512	0.628684		IL7R	ENSMAUG00000016037	1.91492	0.324167		PLXNB3	ENSMAUG00000005458	0.135377	0.476509
UBE2G2	ENSMAUG00000022077	-0.140898	0.0904641		MAGOHB	ENSMAUG00000007271	-0.194781	0.208891		INPP4A	ENSMAUG00000011650	0.0899132	0.221821		PLXNC1	ENSMAUG00000021960	0.0973614	0.446872
UCHL1	ENSMAUG00000000614	-0.167886	0.114249		MAOA	ENSMAUG00000017953	-0.0348825	0.696326		INPP4B	ENSMAUG00000006303	0.108224	0.470788		PPP1CB	ENSMAUG00000015252	0.128342	0.279554
UQCR11	ENSMAUG00000015805	-0.246401	0.158588		MCCC1	ENSMAUG00000018926	-0.0195038	0.843492		INPP5A	ENSMAUG00000002979	0.109227	0.35176		PPP1R12A	ENSMAUG00000021712	0.167992	0.241389
UQCRB	ENSMAUG00000017049	-0.322823	0.0751371		MCCC2	ENSMAUG00000014376	-0.106044	0.281926		INPP5D	ENSMAUG00000007862	0.159156	0.208615		PPP3CA	ENSMAUG00000012231	0.0593175	0.57558
UQCRC1	ENSMAUG00000010209	-0.166851	0.153996		MCEE	ENSMAUG00000010668	-0.172429	0.364638		INPPL1	ENSMAUG00000001936	0.0870952	0.299999		PPP3CB	ENSMAUG00000004509	0.0739495	0.593412
UQCRFS1	ENSMAUG00000016767	-0.170642	0.126392		MCM2	ENSMAUG00000008722	-0.026842	0.840953		IQGAP1	ENSMAUG00000008129	0.0586302	0.61437		PPP3CC	ENSMAUG00000000668	0.021016	0.808948
UQCRQ	ENSMAUG00000021198	-0.1516	0.273431		MCM3	ENSMAUG00000012859	-0.170013	0.359548		IQGAP2	ENSMAUG00000022130	-0.0198653	0.897027		PPP3R1	ENSMAUG00000014614	0.0617302	0.592437
VDAC1	ENSMAUG00000001063	-0.123342	0.165498		MCM4	ENSMAUG00000018869	-0.0512085	0.619669		IQGAP3	ENSMAUG00000008455	0.516114	0.159404		PPP3R2	ENSMAUG00000002415	0.611861	0.301566
VDAC2	ENSMAUG00000006909	-0.2092	0.0771516		MCM5	ENSMAUG00000020308	-0.262944	0.0685211		ITGA1	ENSMAUG00000009756	0.64348	0.266851		PRKACB	ENSMAUG00000002887	0.184368	0.277519
					MCM6	ENSMAUG00000000085	-0.0678891	0.424847		ITGA10	ENSMAUG00000005986	0.265472	0.163714		PRKACG	ENSMAUG00000008589	1.10837	0.307468
					MCM7	ENSMAUG00000013968	-0.0370612	0.756711		ITGA11	ENSMAUG00000002222	0.384064	0.0931501		PRKCA	ENSMAUG00000008808	0.227943	0.33649
					MGST1	ENSMAUG00000001713	-0.120345	0.425535		ITGA2	ENSMAUG00000008103	0.275966	0.369273		PRKX	ENSMAUG00000016058	-0.00362261	0.971025
					MGST2	ENSMAUG00000009690	-0.444646	0.778488		ITGA2B	ENSMAUG00000022208	0.264975	0.310345		PTGER3	ENSMAUG00000011005	0.0475987	0.960784
					MGST3	ENSMAUG00000022162	-0.218545	0.127072		ITGA4	ENSMAUG00000016911	0.120536	0.391355		RAC2	ENSMAUG00000016649	0.295398	0.359432
					MLYCD	ENSMAUG00000016063	-0.0395762	0.730495		ITGA5	ENSMAUG00000017255	0.190401	0.396742		RAF1	ENSMAUG00000015447	0.0724132	0.317462
					MMUT	ENSMAUG00000010779	-0.0144313	0.841769		ITGA6	ENSMAUG00000020187	0.120945	0.166103		RASA1	ENSMAUG00000011139	0.137235	0.144201
					MPV17	ENSMAUG00000019463	-0.180714	0.259356		ITGA7	ENSMAUG00000020070	0.154698	0.288543		RHOD	ENSMAUG00000016108	0.0991156	0.754714
					MPV17L	ENSMAUG00000003589	-0.0597933	0.452077		ITGA8	ENSMAUG00000016581	0.0738385	0.810174		ROBO1	ENSMAUG00000009504	0.194468	0.31957
					MVK	ENSMAUG00000011969	-0.00252013	0.981939		ITGA9	ENSMAUG00000013951	0.193889	0.276513		ROBO2	ENSMAUG00000000429	0.226667	0.12245
					NAA80	ENSMAUG00000015578	-0.110171	0.34742		ITGAD	ENSMAUG00000010022	0.158634	0.579149		ROBO3	ENSMAUG00000016860	0.221336	0.349022
					NAGS	ENSMAUG00000021733	-0.15441	0.248684		ITGAL	ENSMAUG00000010889	0.262154	0.103699		ROCK1	ENSMAUG00000011662	0.185877	0.100282
					NCBP1	ENSMAUG00000020583	-0.0814701	0.348107		ITGAM	ENSMAUG00000014830	0.0352784	0.737103		RPS6KA1	ENSMAUG00000017784	0.101336	0.422035
					NCBP2	ENSMAUG00000021481	-0.178401	0.158306		ITGAV	ENSMAUG00000015740	0.0783697	0.485997		RPS6KA3	ENSMAUG00000015390	0.117336	0.263694
					NME3	ENSMAUG00000008485	-0.226574	0.27507		ITGAX	ENSMAUG00000008615	-0.128346	0.942606		RPS6KA6	ENSMAUG00000001357	0.0953227	0.488929
					NME5	ENSMAUG00000015571	-0.279007	0.0483957		ITGB2	ENSMAUG00000021821	0.0163846	0.928098		RPS6KB1	ENSMAUG00000012729	0.111585	0.648064
					NME7	ENSMAUG00000015900	-0.0501091	0.662194		ITGB3	ENSMAUG00000015611	1.25281	0.0431881		RYR1	ENSMAUG00000016404	0.221794	0.291113
					NOS2	ENSMAUG00000016350	0.00599766	0.982291		ITGB4	ENSMAUG00000017795	0.202601	0.360533		RYR2	ENSMAUG00000021608	0.289957	0.0794945
					NOS3	ENSMAUG00000016919	-0.143007	0.170512		ITGB7	ENSMAUG00000020375	0.0548985	0.874136		RYR3	ENSMAUG00000021512	0.37922	0.0633286
					NT5C	ENSMAUG00000015203	0.0179991	0.915324		ITGB8	ENSMAUG00000000108	0.307652	0.183614		SEMA3C	ENSMAUG00000013450	0.102559	0.490444
					NT5C1B	ENSMAUG00000018395	-1.42503	0.686193		ITPR1	ENSMAUG00000016842	0.186393	0.219749		SEMA4A	ENSMAUG00000017061	0.256103	0.0559022
					NT5C2	ENSMAUG00000018081	0.0298215	0.854949		ITPR2	ENSMAUG00000012727	0.316934	0.0884633		SEMA4C	ENSMAUG00000012863	0.0972893	0.374522
					NT5C3A	ENSMAUG00000012474	-0.128394	0.309342		ITPR3	ENSMAUG00000019945	0.175504	0.247437		SEMA4D	ENSMAUG00000018331	0.0902198	0.412533
					NT5E	ENSMAUG00000014835	-0.0636337	0.527839		JAK2	ENSMAUG00000008571	0.0642407	0.446568		SEMA4F	ENSMAUG00000009786	0.0836851	0.386657
					NT5M	ENSMAUG00000017068	-0.0256375	0.796261		JAK3	ENSMAUG00000010255	0.0553224	0.48108		SEMA5A	ENSMAUG00000021882	0.269906	0.280878
					NUDT2	ENSMAUG00000021656	-0.160561	0.435329		KITLG	ENSMAUG00000016386	0.158844	0.259463		SEMA5B	ENSMAUG00000019953	0.0715744	0.459298
					OAT	ENSMAUG00000006454	-0.0333952	0.735298		KRAS	ENSMAUG00000017232	0.15624	0.177793		SEMA6A	ENSMAUG00000018043	0.0613205	0.54364
					OTC	ENSMAUG00000009398	-0.153361	0.506565		LAMA2	ENSMAUG00000010027	0.209923	0.0917922		SEMA6D	ENSMAUG00000017126	0.116071	0.222512
					OXA1L	ENSMAUG00000005100	-0.177034	0.0641503		LAMA4	ENSMAUG00000008791	0.0768772	0.579299		SHC1	ENSMAUG00000019925	0.0799673	0.654866
					P4HA1	ENSMAUG00000011056	-0.0669236	0.408951		LAMA5	ENSMAUG00000015139	0.204188	0.245535		SLC8A1	ENSMAUG00000014024	0.436309	0.0683559
					P4HA2	ENSMAUG00000007802	-0.156397	0.332301		LAMB3	ENSMAUG00000011370	0.113687	0.729615		SLC8A2	ENSMAUG00000010121	0.0303681	0.760309
					P4HA3	ENSMAUG00000018103	-0.129549	0.443879		LAMC1	ENSMAUG00000014238	0.0399215	0.688347		SLIT1	ENSMAUG00000002133	0.107166	0.403202
					PAH	ENSMAUG00000018432	-0.932141	0.566579		LEP	ENSMAUG00000020902	1.48839	0.438904		SLIT2	ENSMAUG00000011068	0.115653	0.44156
					PAOX	ENSMAUG00000002036	0.0209904	0.842647		LGMN	ENSMAUG00000018319	-0.105211	0.202015		SLIT3	ENSMAUG00000020131	0.127804	0.311501
					PCBP1	ENSMAUG00000009843	-0.0312753	0.747111		LIFR	ENSMAUG00000015733	0.415921	0.175349		SOS1	ENSMAUG00000000251	0.116286	0.257747
					PCCA	ENSMAUG00000000626	0.0189799	0.805814		LIMK2	ENSMAUG00000005275	-0.0270068	0.801323		SOS2	ENSMAUG00000013147	0.193705	0.043535
					PCCB	ENSMAUG00000001715	-0.0913819	0.374447		LTA	ENSMAUG00000007902	-0.299596	0.676089		SPHK1	ENSMAUG00000010100	0.150425	0.648287
					PCNA	ENSMAUG00000010813	-0.150217	0.357016		MAP2K1	ENSMAUG00000011379	-0.00860446	0.893616		SPHK2	ENSMAUG00000008391	-0.00191776	0.983609
					PECR	ENSMAUG00000009535	-0.0104742	0.951998		MAPK1	ENSMAUG00000017100	0.0263227	0.78522		SRGAP1	ENSMAUG00000016602	0.408989	0.0465588
					PEX10	ENSMAUG00000011441	-0.352757	0.0174593		MAPK10	ENSMAUG00000017023	0.0771885	0.590226		SRGAP3	ENSMAUG00000020606	0.238707	0.199393
					PEX11A	ENSMAUG00000016721	-0.144807	0.135733		MAPK8	ENSMAUG00000006379	0.0504747	0.522062		STAT5A	ENSMAUG00000006283	0.354151	0.0473443
					PEX11B	ENSMAUG00000013080	-0.100982	0.290604		MAPK9	ENSMAUG00000017175	0.0515124	0.478517		TACR1	ENSMAUG00000016810	0.163866	0.527687
					PEX11G	ENSMAUG00000008511	-0.0163667	0.954484		MET	ENSMAUG00000012960	0.19298	0.234445		TACR2	ENSMAUG00000008248	-0.0337244	0.963752
					PEX12	ENSMAUG00000004768	-0.096513	0.523486		MRAS	ENSMAUG00000010837	0.0992701	0.398972		TGFA	ENSMAUG00000017727	0.240159	0.26634
					PEX13	ENSMAUG00000009603	-0.0345741	0.780953		MS4A1	ENSMAUG00000011984	4.14486	0.0651642		TRHR	ENSMAUG00000009912	0.168417	0.661691
					PEX14	ENSMAUG00000017642	-0.118367	0.305635		MSN	ENSMAUG00000006616	0.0151482	0.864719		TRPC1	ENSMAUG00000010246	0.136125	0.392716
					PEX16	ENSMAUG00000011878	-0.102272	0.319996		MTOR	ENSMAUG00000015520	0.114299	0.245443		UNC5B	ENSMAUG00000011675	0.208104	0.0866569
					PEX19	ENSMAUG00000008866	-0.0389908	0.538361		MYH10	ENSMAUG00000014356	0.12057	0.233009		UNC5C	ENSMAUG00000014521	0.39081	0.242517
					PEX2	ENSMAUG00000015605	-0.143474	0.202226		MYH14	ENSMAUG00000012716	0.103329	0.257245		UNC5D	ENSMAUG00000021906	0.435139	0.0519447
					PEX26	ENSMAUG00000021306	-0.00378926	0.967133		MYH9	ENSMAUG00000016904	0.078375	0.328607
					PEX5	ENSMAUG00000012548	0.0219179	0.777385		MYL11	ENSMAUG00000010599	0.681515	0.583449
					PEX6	ENSMAUG00000015976	-0.128461	0.177179		MYL2	ENSMAUG00000021087	1.23585	0.608857
					PEX7	ENSMAUG00000011551	0.0225735	0.875132		MYLK2	ENSMAUG00000011764	1.58813	0.433591
					PFKL	ENSMAUG00000017741	-0.0866028	0.320532		NCKAP1	ENSMAUG00000017749	0.0250045	0.80307
					PFKM	ENSMAUG00000016492	-0.0509591	0.388826		NCKAP1L	ENSMAUG00000018822	-0.0204326	0.852917
					PFKP	ENSMAUG00000014078	-0.0496732	0.463615		NFYC	ENSMAUG00000018833	-0.200376	0.0772269
					PGD	ENSMAUG00000014619	-0.0509212	0.506109		OCRL	ENSMAUG00000011733	0.0728442	0.414715
					PGLS	ENSMAUG00000022046	-0.25647	0.0657166		OSMR	ENSMAUG00000019728	0.0860301	0.748186
					PGM1	ENSMAUG00000000807	-0.13791	0.132285		PAK2	ENSMAUG00000021281	0.0717178	0.505287
					PGM2	ENSMAUG00000009577	-0.132945	0.272912		PAK3	ENSMAUG00000008848	0.155078	0.161563
					PHF5A	ENSMAUG00000017124	-0.184679	0.226962		PAK4	ENSMAUG00000020347	-0.0202413	0.868767
					PHYH	ENSMAUG00000021652	-0.182438	0.150109		PAK5	ENSMAUG00000011943	0.0187517	0.832997
					PIPOX	ENSMAUG00000020672	-0.0788088	0.657552		PAK6	ENSMAUG00000009200	0.0403639	0.683665
					PLA2G12A	ENSMAUG00000019760	-0.168876	0.133838		PARVA	ENSMAUG00000008966	0.128967	0.32885
					PLA2G2C	ENSMAUG00000001804	-0.382142	0.584921		PARVG	ENSMAUG00000022195	0.173623	0.612264
					PLA2G2D	ENSMAUG00000000970	-1.58405	0.629983		PDGFB	ENSMAUG00000010966	-0.00750785	0.949016
					PLA2G3	ENSMAUG00000022002	-0.203757	0.677835		PDGFC	ENSMAUG00000015231	0.0327887	0.800398
					PLA2G5	ENSMAUG00000011239	-0.790483	0.420299		PDGFD	ENSMAUG00000012917	0.228622	0.267832
					PLRG1	ENSMAUG00000003101	-0.0180562	0.877345		PDGFRA	ENSMAUG00000018986	0.102566	0.284833
					PMVK	ENSMAUG00000008973	-0.322194	0.0817601		PDGFRB	ENSMAUG00000012051	0.0438066	0.633798
					PNP	ENSMAUG00000015711	-0.12713	0.445963		PDIA3	ENSMAUG00000011249	-0.197167	0.127501
					POLD1	ENSMAUG00000004006	-0.160055	0.12541		PDPK1	ENSMAUG00000008130	0.209547	0.294555
					POLD2	ENSMAUG00000008387	-0.0543153	0.602656		PFN4	ENSMAUG00000009601	2.59215	0.241788
					POLD4	ENSMAUG00000016004	-0.17502	0.316236		PGF	ENSMAUG00000000890	0.442032	0.240782
					POLE2	ENSMAUG00000001075	-0.056244	0.755984		PI4KA	ENSMAUG00000009972	0.0983702	0.360406
					POLE3	ENSMAUG00000000366	-0.0495411	0.580775		PIAS1	ENSMAUG00000000785	0.222495	0.157977
					POLE4	ENSMAUG00000002015	0.010694	0.939843		PIAS2	ENSMAUG00000014565	0.231853	0.0143994
					POLR1A	ENSMAUG00000008497	-0.013853	0.893926		PIAS3	ENSMAUG00000018348	0.103917	0.504224
					POLR1B	ENSMAUG00000010593	-0.0661855	0.641467		PIK3C2A	ENSMAUG00000009052	0.308123	0.0989501
					POLR1C	ENSMAUG00000014329	-0.234686	0.0862341		PIK3C2B	ENSMAUG00000021709	0.0981383	0.426394
					POLR1D	ENSMAUG00000001946	-0.207396	0.109024		PIK3C3	ENSMAUG00000008849	0.126239	0.132735
					POLR1E	ENSMAUG00000021044	-0.04276	0.753095		PIK3CA	ENSMAUG00000019874	0.0748318	0.340457
					POLR1H	ENSMAUG00000000386	-0.0626387	0.771437		PIK3CB	ENSMAUG00000006981	0.000417619	0.99663
					POLR2D	ENSMAUG00000014518	-0.0336928	0.813619		PIK3CG	ENSMAUG00000000671	0.252345	0.0834099
					POLR2F	ENSMAUG00000018586	-0.335105	0.0561669		PIK3R1	ENSMAUG00000008232	0.0700548	0.356301
					POLR2G	ENSMAUG00000013079	0.0140465	0.943375		PIK3R3	ENSMAUG00000002444	0.12828	0.427089
					POLR2H	ENSMAUG00000016338	-0.0617163	0.612256		PIK3R5	ENSMAUG00000020086	0.485537	0.0632081
					POLR2I	ENSMAUG00000001001	-0.0967747	0.721181		PIKFYVE	ENSMAUG00000001410	0.271204	0.0621061
					POLR2J	ENSMAUG00000013049	-0.109406	0.416852		PIP4K2A	ENSMAUG00000012593	0.0568623	0.612482
					POLR2K	ENSMAUG00000010288	-0.334086	0.0384198		PIP4K2B	ENSMAUG00000012875	0.0659644	0.682302
					POLR2L	ENSMAUG00000019023	-0.350005	0.100915		PIP4K2C	ENSMAUG00000019443	-0.025065	0.817512
					POLR3A	ENSMAUG00000016247	-0.040907	0.590429		PIP5K1B	ENSMAUG00000010912	0.0535623	0.590921
					POLR3B	ENSMAUG00000010200	0.0223463	0.830597		PLCB1	ENSMAUG00000015228	0.172512	0.345382
					POLR3F	ENSMAUG00000020176	-0.0113271	0.915609		PLCB2	ENSMAUG00000006285	0.126515	0.346588
					POLR3H	ENSMAUG00000022215	-0.0836632	0.581951		PLCB4	ENSMAUG00000012557	0.0735681	0.593667
					POMP	ENSMAUG00000006509	-0.199905	0.20787		PLCD3	ENSMAUG00000001235	0.20706	0.138871
					PPIE	ENSMAUG00000020323	-0.134537	0.402623		PLCE1	ENSMAUG00000003152	0.170249	0.180726
					PPIH	ENSMAUG00000016280	-0.0376688	0.84654		PPP1CB	ENSMAUG00000015252	0.128342	0.279554
					PPIL1	ENSMAUG00000008428	-0.179069	0.199523		PPP1R12A	ENSMAUG00000021712	0.167992	0.241389
					PQBP1	ENSMAUG00000013093	-0.151914	0.227363		PRKAA1	ENSMAUG00000001004	0.212589	0.269114
					PRDX1	ENSMAUG00000011355	-0.174229	0.119945		PRKAA2	ENSMAUG00000006545	0.561958	0.021148
					PRDX5	ENSMAUG00000014789	-0.143276	0.44596		PRKCA	ENSMAUG00000008808	0.227943	0.33649
					PRDX6	ENSMAUG00000012265	-0.202329	0.0266063		PSME1	ENSMAUG00000015111	-0.177163	0.202081
					PRIM1	ENSMAUG00000008749	-0.0280941	0.876885		PSME2	ENSMAUG00000015092	-0.209183	0.206729
					PRIM2	ENSMAUG00000009565	-0.0881885	0.561431		PTEN	ENSMAUG00000006159	0.173504	0.268181
					PRODH	ENSMAUG00000013845	-0.0581057	0.669224		PTPN11	ENSMAUG00000013671	0.0589072	0.457856
					PRODH2	ENSMAUG00000014802	0.0183098	0.980197		RAC2	ENSMAUG00000016649	0.295398	0.359432
					PRPF19	ENSMAUG00000012585	-0.0782255	0.323401		RAF1	ENSMAUG00000015447	0.0724132	0.317462
					PRPF3	ENSMAUG00000017112	-0.0543228	0.599535		RAP1A	ENSMAUG00000013379	0.0495576	0.707272
					PRPF31	ENSMAUG00000011581	-0.0727222	0.458145		RAPGEF1	ENSMAUG00000012266	0.0983178	0.425834
					PRPF4	ENSMAUG00000018022	-0.0352807	0.618663		RASGRF1	ENSMAUG00000013291	0.0558357	0.649016
					PRPF40B	ENSMAUG00000012461	-0.0140682	0.917578		RDX	ENSMAUG00000014149	0.0342237	0.687329
					PRPF8	ENSMAUG00000014365	-0.070943	0.356036		RELN	ENSMAUG00000018537	0.334565	0.0572148
					PRPS1	ENSMAUG00000014581	-0.0861201	0.347562		RFX5	ENSMAUG00000018172	-0.0411613	0.649162
					PRPS2	ENSMAUG00000022032	-0.092653	0.57871		RFXANK	ENSMAUG00000002477	-0.16275	0.303334
					PSMA1	ENSMAUG00000008437	-0.141903	0.329336		RFXAP	ENSMAUG00000003109	-0.0961177	0.467382
					PSMA2	ENSMAUG00000009719	-0.166861	0.25239		RICTOR	ENSMAUG00000013015	0.207707	0.096037
					PSMA3	ENSMAUG00000020737	-0.184303	0.104299		ROCK1	ENSMAUG00000011662	0.185877	0.100282
					PSMA4	ENSMAUG00000011209	-0.060941	0.626024		RPS6KA1	ENSMAUG00000017784	0.101336	0.422035
					PSMA5	ENSMAUG00000019226	-0.0696887	0.648538		RPS6KA3	ENSMAUG00000015390	0.117336	0.263694
					PSMA6	ENSMAUG00000019916	-0.131887	0.316806		RPS6KA6	ENSMAUG00000001357	0.0953227	0.488929
					PSMA7	ENSMAUG00000011223	-0.280749	0.0796226		RPS6KB1	ENSMAUG00000012729	0.111585	0.648064
					PSMB1	ENSMAUG00000016104	-0.223506	0.117452		RPTOR	ENSMAUG00000011027	0.102684	0.383641
					PSMB2	ENSMAUG00000021796	-0.199444	0.108114		SCIN	ENSMAUG00000010111	0.168269	0.684313
					PSMB4	ENSMAUG00000015230	-0.206356	0.186351		SDC3	ENSMAUG00000010664	0.0312494	0.841843
					PSMB6	ENSMAUG00000020184	-0.143122	0.296019		SHC1	ENSMAUG00000019925	0.0799673	0.654866
					PSMB7	ENSMAUG00000009541	-0.162433	0.196131		SLC9A1	ENSMAUG00000001078	0.132259	0.553395
					PSMB8	ENSMAUG00000003396	-0.16889	0.569491		SOCS1	ENSMAUG00000015623	0.430474	0.166697
					PSMB9	ENSMAUG00000007584	-0.339293	0.238949		SOCS3	ENSMAUG00000010984	0.0937628	0.583738
					PSMC1	ENSMAUG00000019744	-0.114866	0.468627		SOCS4	ENSMAUG00000012486	0.251007	0.293574
					PSMC2	ENSMAUG00000008073	-0.165459	0.206466		SOCS7	ENSMAUG00000015461	0.332395	0.153688
					PSMC3	ENSMAUG00000007346	-0.0962613	0.409157		SOS1	ENSMAUG00000000251	0.116286	0.257747
					PSMC4	ENSMAUG00000009116	-0.206187	0.0944147		SOS2	ENSMAUG00000013147	0.193705	0.043535
					PSMC5	ENSMAUG00000012661	-0.1011	0.44143		SPRED2	ENSMAUG00000013657	0.156231	0.237532
					PSMC6	ENSMAUG00000007830	-0.0981624	0.298744		SPRY3	ENSMAUG00000010073	0.272484	0.140478
					PSMD1	ENSMAUG00000016285	-0.0794212	0.26094		SSH1	ENSMAUG00000000524	0.0613678	0.603309
					PSMD11	ENSMAUG00000019073	-0.0808565	0.304707		SSH2	ENSMAUG00000020745	0.334009	0.186207
					PSMD12	ENSMAUG00000013274	-0.106167	0.31512		SSH3	ENSMAUG00000016554	-0.0320071	0.841983
					PSMD14	ENSMAUG00000014021	-0.067063	0.567462		STAM	ENSMAUG00000001053	0.193942	0.335159
					PSMD2	ENSMAUG00000014316	-0.0978182	0.362367		STAM2	ENSMAUG00000000322	0.105787	0.336538
					PSMD3	ENSMAUG00000014277	-0.109593	0.307974		STAT2	ENSMAUG00000012842	0.172178	0.0914279
					PSMD4	ENSMAUG00000019832	-0.155269	0.276613		STAT5A	ENSMAUG00000006283	0.354151	0.0473443
					PSMD6	ENSMAUG00000012233	-0.121629	0.230677		STAT6	ENSMAUG00000000383	0.134572	0.268971
					PSMD7	ENSMAUG00000012063	-0.171474	0.169138		STRADA	ENSMAUG00000014363	0.0943351	0.209191
					PSMD8	ENSMAUG00000018967	-0.162011	0.257494		SV2B	ENSMAUG00000013525	0.130648	0.46656
					PSME1	ENSMAUG00000015111	-0.177163	0.202081		SV2C	ENSMAUG00000005414	0.597396	0.00998532
					PSME2	ENSMAUG00000015092	-0.209183	0.206729		SYNJ1	ENSMAUG00000009743	0.0821378	0.490689
					PSMF1	ENSMAUG00000012408	-0.19864	0.115291		SYNJ2	ENSMAUG00000022212	0.0632972	0.595396
					PTGDS	ENSMAUG00000003427	-0.316808	0.45478		TAP2	ENSMAUG00000015081	-0.151646	0.198581
					PTGES2	ENSMAUG00000017701	-0.132963	0.241154		TAPBP	ENSMAUG00000005999	-0.183522	0.00910582
					PTGIS	ENSMAUG00000016166	-0.323813	0.093309		TFRC	ENSMAUG00000006849	0.147496	0.103075
					PXMP2	ENSMAUG00000012927	-0.0651861	0.647757		THBS1	ENSMAUG00000021125	0.312931	0.0259026
					PXMP4	ENSMAUG00000015504	-0.0193514	0.874983		THBS2	ENSMAUG00000011839	0.322196	0.028694
					PYCR1	ENSMAUG00000000981	0.00932289	0.959649		THBS3	ENSMAUG00000020310	0.308977	0.0891202
					PYCR2	ENSMAUG00000017705	-0.0552512	0.681173		TIAM1	ENSMAUG00000010458	0.148506	0.282601
					PYCR3	ENSMAUG00000018085	-0.247016	0.140432		TIAM2	ENSMAUG00000016491	-0.0245618	0.819128
					RBKS	ENSMAUG00000009060	-0.0639221	0.77675		TLN1	ENSMAUG00000003449	0.0762291	0.367299
					RBM17	ENSMAUG00000019247	-0.162912	0.168678		TLN2	ENSMAUG00000011104	0.136062	0.293498
					RBM22	ENSMAUG00000001133	-0.208306	0.0352557		TNC	ENSMAUG00000019426	0.146798	0.218507
					RBM25	ENSMAUG00000017751	-0.305669	0.154464		TNR	ENSMAUG00000000637	0.422723	0.264073
					RBM8A	ENSMAUG00000016783	-0.043327	0.739318		TNXB	ENSMAUG00000019386	0.126435	0.476093
					RFC1	ENSMAUG00000015509	-0.0679241	0.468761		TPO	ENSMAUG00000001044	0.171448	0.603089
					RFC3	ENSMAUG00000016464	-0.0752767	0.612375		TSC1	ENSMAUG00000021557	0.174212	0.178947
					RFC4	ENSMAUG00000004500	-0.239896	0.191778		TSC2	ENSMAUG00000007571	0.0696158	0.600066
					RFC5	ENSMAUG00000008750	-0.153476	0.34316		TYK2	ENSMAUG00000017865	0.0839846	0.593712
					RNASEH1	ENSMAUG00000014957	-0.0649467	0.506186		ULK1	ENSMAUG00000004257	0.150961	0.166773
					RNASEH2A	ENSMAUG00000008286	-0.118414	0.604908		ULK2	ENSMAUG00000019111	0.144397	0.258415
					RNASEH2B	ENSMAUG00000016520	-0.13608	0.353631		ULK3	ENSMAUG00000003997	0.0739738	0.555887
					RPA1	ENSMAUG00000010474	0.00202015	0.986611		VAV1	ENSMAUG00000021145	0.0423824	0.786305
					RPA2	ENSMAUG00000002825	-0.234908	0.123289		VAV3	ENSMAUG00000008424	0.0371713	0.806948
					RPIA	ENSMAUG00000017330	-0.183678	0.313866		VCL	ENSMAUG00000005028	0.0817869	0.479971
					RPL10A	ENSMAUG00000020124	-0.223299	0.098615		VEGFA	ENSMAUG00000007292	0.125674	0.493674
					RPL10L	ENSMAUG00000001365	-0.313801	0.751115		VEGFD	ENSMAUG00000016168	0.311395	0.43269
					RPL17	ENSMAUG00000016494	-0.810336	0.153814		VWF	ENSMAUG00000009725	0.133889	0.546773
					RPL18A	ENSMAUG00000008889	-0.182196	0.29416		WASF1	ENSMAUG00000013386	0.0234548	0.823892
					RPL19	ENSMAUG00000008307	-0.141148	0.392953		WASF2	ENSMAUG00000012124	0.170294	0.355294
					RPL22	ENSMAUG00000001047	-0.119629	0.311474		WASL	ENSMAUG00000019789	0.0583174	0.528138
					RPL23	ENSMAUG00000012907	-0.231984	0.287774
					RPL24	ENSMAUG00000013489	-0.223771	0.139972
					RPL27A	ENSMAUG00000006717	-0.210979	0.656944
					RPL30	ENSMAUG00000006886	-0.208222	0.20878
					RPL31	ENSMAUG00000010388	-0.192076	0.222533
					RPL32	ENSMAUG00000009858	-0.250252	0.133736
					RPL34	ENSMAUG00000010445	-1.02586	0.340365
					RPL36A	ENSMAUG00000021261	-0.287574	0.113256
					RPL37A	ENSMAUG00000020042	-0.366438	0.0597606
					RPL6	ENSMAUG00000008637	-0.0964492	0.524737
					RPL7A	ENSMAUG00000016150	-0.183867	0.0709226
					RPL9	ENSMAUG00000012459	-0.170146	0.537635
					RPS12	ENSMAUG00000016653	-0.150462	0.435829
					RPS15A	ENSMAUG00000016548	-0.381016	0.0574924
					RPS16	ENSMAUG00000016611	-0.13765	0.363447
					RPS17	ENSMAUG00000017234	-0.21034	0.249364
					RPS27L	ENSMAUG00000014151	-0.282986	0.182502
					RPS28	ENSMAUG00000014417	-0.174851	0.551858
					RPS3	ENSMAUG00000006329	-1.78708	0.047962
					RPS4X	ENSMAUG00000013223	-0.273228	0.118969
					RPS5	ENSMAUG00000010731	-0.151111	0.278271
					RPS6	ENSMAUG00000014284	-0.229949	0.187688
					RPS7	ENSMAUG00000000660	-0.656291	0.699621
					RPS9	ENSMAUG00000016938	-0.10375	0.523936
					RRM1	ENSMAUG00000010079	-0.0454999	0.717937
					RRM2	ENSMAUG00000016595	-0.968705	0.160875
					RRM2B	ENSMAUG00000018657	0.0286976	0.807566
					SART1	ENSMAUG00000016274	-0.103473	0.378071
					SAT1	ENSMAUG00000019369	-0.108504	0.321949
					SAT2	ENSMAUG00000021610	-0.109337	0.352226
					SEC11A	ENSMAUG00000017735	-0.0985084	0.465025
					SEC11C	ENSMAUG00000019336	-0.121002	0.374257
					SEC61A1	ENSMAUG00000003472	-0.0869263	0.309075
					SEC61B	ENSMAUG00000020997	-0.168314	0.376522
					SEC61G	ENSMAUG00000013808	-0.115049	0.474487
					SEC62	ENSMAUG00000011713	-0.0685503	0.503777
					SEM1	ENSMAUG00000016213	-0.2726	0.265543
					SF3A1	ENSMAUG00000020317	-0.0234996	0.745068
					SF3A2	ENSMAUG00000005644	-0.203688	0.0175279
					SF3A3	ENSMAUG00000013931	-0.16686	0.281561
					SF3B2	ENSMAUG00000017040	-0.114387	0.254439
					SF3B4	ENSMAUG00000015266	-0.0838595	0.409859
					SF3B5	ENSMAUG00000008283	-0.230387	0.14586
					SLC25A17	ENSMAUG00000017231	-0.0743177	0.542778
					SLC27A2	ENSMAUG00000016759	-0.486601	0.759833
					SLU7	ENSMAUG00000016739	-0.089257	0.309379
					SMS	ENSMAUG00000017854	0.0275392	0.775553
					SNRNP27	ENSMAUG00000021913	-0.0559887	0.585264
					SNRNP40	ENSMAUG00000016062	-0.0956424	0.363936
					SNRPA	ENSMAUG00000008754	-0.0413229	0.608608
					SNRPA1	ENSMAUG00000015339	-0.0350358	0.831687
					SNRPB2	ENSMAUG00000006149	-0.0557054	0.692617
					SNRPD2	ENSMAUG00000018849	-0.300706	0.111142
					SNRPD3	ENSMAUG00000021393	-0.0891955	0.368248
					SNRPF	ENSMAUG00000008799	-0.161997	0.731085
					SNU13	ENSMAUG00000010871	-0.161833	0.182904
					SNW1	ENSMAUG00000016972	-0.0888647	0.445385
					SOD1	ENSMAUG00000018610	-0.17204	0.344333
					SOD2	ENSMAUG00000021246	-0.0145383	0.870399
					SPCS1	ENSMAUG00000000391	-0.219535	0.150138
					SPCS2	ENSMAUG00000011785	-0.112846	0.434032
					SRM	ENSMAUG00000005303	-0.237105	0.0306259
					SRP14	ENSMAUG00000019839	-0.203206	0.0459796
					SRP54	ENSMAUG00000014447	-0.0627634	0.531463
					SRP9	ENSMAUG00000017552	-0.118192	0.359307
					SRPRB	ENSMAUG00000021695	-0.184958	0.112417
					SRSF4	ENSMAUG00000021940	-0.162158	0.0410301
					SRSF5	ENSMAUG00000009544	-0.0159169	0.86104
					SUCLA2	ENSMAUG00000008374	-0.00188786	0.979817
					SUCLG1	ENSMAUG00000020136	-0.160355	0.132323
					SUCLG2	ENSMAUG00000021321	-0.105192	0.388091
					SYF2	ENSMAUG00000018974	-0.171107	0.296208
					TALDO1	ENSMAUG00000001586	-0.148937	0.250918
					TAT	ENSMAUG00000010472	-1.41741	0.687811
					TBXAS1	ENSMAUG00000008938	-0.138703	0.479784
					THOC1	ENSMAUG00000010272	-0.0876921	0.441404
					THOC3	ENSMAUG00000011225	-0.0850998	0.370534
					TK2	ENSMAUG00000014656	-0.185241	0.0638904
					TKT	ENSMAUG00000006563	-0.183143	0.053456
					TXNDC12	ENSMAUG00000008444	-0.0727547	0.61296
					TXNL4A	ENSMAUG00000021849	-0.196872	0.287388
					TXNRD2	ENSMAUG00000001013	-0.028501	0.832117
					U2AF1	ENSMAUG00000020528	-0.161967	0.174505
					U2AF2	ENSMAUG00000008180	-0.1277	0.111975
					UBA52	ENSMAUG00000002775	-0.272678	0.0513796
					UCK1	ENSMAUG00000005913	-0.202952	0.0306776
					UCK2	ENSMAUG00000005491	-0.0939498	0.261418
					UCKL1	ENSMAUG00000002846	-0.135621	0.308455
					UMPS	ENSMAUG00000010311	-0.299892	0.0222727
					UPB1	ENSMAUG00000015089	0.0297669	0.95376
					UPP1	ENSMAUG00000009149	-0.238073	0.177905
					UPP2	ENSMAUG00000000231	-0.0332395	0.842716
					USP39	ENSMAUG00000009400	-0.145995	0.171386
					XAB2	ENSMAUG00000016507	-0.0839745	0.428663
					XDH	ENSMAUG00000016555	-0.105758	0.575098
					ZMAT2	ENSMAUG00000016579	-0.103587	0.26503

## Sheet: Males-IB12_vs_IV
Core enrichment genes associated with the main enriched KEGG pathways identified by GSEA in the contrast between males Infected - B12 and males Infected - vehicle
Mitochondrial energy metabolism and neurodegenerative diseases					Bioenergetic demand					Neuroimmune homeostasis
Enriched KEGG pathways - activated: Citrate cycle, TCA cycle; Oxidative phosphorylation pathways; Parkinson's disease					Enriched KEGG pathways - activated: Propanoate metabolism; Ribosome					Enriched KEGG pathway - inhibited: ECM receptor interaction
Human gene symbol	M. auratus gene ID	log2 Fold change	P value		Human gene symbol	M. auratus gene ID	log2 Fold change	P value		Human gene symbol	M. auratus gene ID	log2 Fold change	P value
ACLY	ENSMAUG00000000465	0.0299646	0.633685		ABAT	ENSMAUG00000006912	0.113868	0.178349		AGRN	ENSMAUG00000011047	-0.142449	0.175643
ACO1	ENSMAUG00000021408	0.0598701	0.360196		ACACA	ENSMAUG00000017414	0.0768815	0.341176		CD44	ENSMAUG00000004546	-0.130939	0.268674
ACO2	ENSMAUG00000007598	0.13493	0.05113		ACADM	ENSMAUG00000000918	0.0379062	0.726571		CHAD	ENSMAUG00000020237	-0.160723	0.230257
APAF1	ENSMAUG00000007841	0.303175	0.391926		ACAT1	ENSMAUG00000011317	0.0879281	0.258783		COL11A1	ENSMAUG00000013059	-0.188465	0.383322
ATP12A	ENSMAUG00000020518	0.505478	0.705508		ACSS1	ENSMAUG00000016079	0.0344443	0.703518		COL11A2	ENSMAUG00000021348	-0.185747	0.15872
ATP4A	ENSMAUG00000020584	0.0967555	0.613498		ACSS3	ENSMAUG00000014131	0.242839	0.115582		COL1A1	ENSMAUG00000019272	-0.295665	0.121077
ATP5F1C	ENSMAUG00000014343	0.0688899	0.401957		ALDH1B1	ENSMAUG00000002155	0.04797	0.626743		COL1A2	ENSMAUG00000018627	-0.539869	0.104536
ATP5F1D	ENSMAUG00000007050	0.279635	0.00342599		ALDH2	ENSMAUG00000009022	0.153998	0.139136		COL3A1	ENSMAUG00000010371	-0.657917	0.00050556
ATP5F1E	ENSMAUG00000011798	0.204571	0.0752842		ALDH3A2	ENSMAUG00000019270	0.0500938	0.650006		COL4A1	ENSMAUG00000021359	-0.293384	0.22364
ATP5MC3	ENSMAUG00000017685	0.143799	0.0505846		ALDH6A1	ENSMAUG00000016891	0.159991	0.126985		COL4A2	ENSMAUG00000020267	-0.280293	0.35318
ATP5MF	ENSMAUG00000018419	0.133838	0.154593		ALDH7A1	ENSMAUG00000001614	0.0816118	0.318674		COL4A6	ENSMAUG00000001918	-0.863966	0.00217891
ATP5PD	ENSMAUG00000000650	0.129003	0.109248		ECHS1	ENSMAUG00000020964	0.0610815	0.431747		COL5A1	ENSMAUG00000011031	-0.197659	0.475649
ATP5PF	ENSMAUG00000020461	0.104744	0.168869		FAU	ENSMAUG00000014406	0.158128	0.10183		COL5A2	ENSMAUG00000011023	-0.343387	0.139526
ATP6AP1	ENSMAUG00000014514	0.0990713	0.175548		HADHA	ENSMAUG00000004383	0.0447327	0.500209		COL5A3	ENSMAUG00000006118	-0.288163	0.229345
ATP6V0A1	ENSMAUG00000002684	0.103637	0.115539		HIBCH	ENSMAUG00000008623	0.0625342	0.409345		COL6A2	ENSMAUG00000022073	-0.203075	0.225934
ATP6V0D2	ENSMAUG00000001919	0.208885	0.79179		LDHB	ENSMAUG00000008520	0.0505782	0.495266		COL6A6	ENSMAUG00000011745	-0.162103	0.686922
ATP6V0E2	ENSMAUG00000020438	0.128292	0.0647126		MCEE	ENSMAUG00000010668	0.0934862	0.590572		FN1	ENSMAUG00000001872	-0.439698	0.2615
ATP6V1B1	ENSMAUG00000018630	0.163975	0.836379		MLYCD	ENSMAUG00000016063	0.0478636	0.606565		GP1BB	ENSMAUG00000016778	-0.198985	0.596595
ATP6V1B2	ENSMAUG00000018466	0.0628875	0.425303		MMUT	ENSMAUG00000010779	0.0993457	0.166355		HSPG2	ENSMAUG00000009979	-0.399899	0.0334943
ATP6V1C2	ENSMAUG00000012261	0.089968	0.791927		PCCB	ENSMAUG00000001715	0.0572025	0.528313		ITGA1	ENSMAUG00000009756	-0.360299	0.440095
ATP6V1E1	ENSMAUG00000010551	0.0697451	0.310658		RPL18A	ENSMAUG00000008889	0.28475	0.0290059		ITGA11	ENSMAUG00000002222	-0.185226	0.295392
ATP6V1G2	ENSMAUG00000016081	0.174236	0.0724446		RPL22	ENSMAUG00000001047	0.176134	0.0318809		ITGA2B	ENSMAUG00000022208	-0.193051	0.328449
CASP9	ENSMAUG00000014326	0.192862	0.056637		RPL22L1	ENSMAUG00000018874	0.201055	0.24211		ITGA4	ENSMAUG00000016911	-0.258666	0.164007
COX10	ENSMAUG00000002188	0.141335	0.178628		RPL23	ENSMAUG00000012907	0.266453	0.00843121		ITGA5	ENSMAUG00000017255	-0.33825	0.176534
COX11	ENSMAUG00000008185	0.15117	0.100606		RPL24	ENSMAUG00000013489	0.198119	0.0712331		ITGA7	ENSMAUG00000020070	-0.327349	0.00653947
COX15	ENSMAUG00000019550	0.0819742	0.272209		RPL30	ENSMAUG00000006886	0.137634	0.208843		ITGB3	ENSMAUG00000015611	-0.477733	0.147492
COX5B	ENSMAUG00000017662	0.231708	0.00582339		RPL31	ENSMAUG00000010388	0.190458	0.196795		ITGB4	ENSMAUG00000017795	-0.155552	0.453215
COX6B1	ENSMAUG00000011240	0.131017	0.123831		RPL34	ENSMAUG00000010445	0.632848	0.520962		ITGB7	ENSMAUG00000020375	-0.227171	0.439488
COX6B2	ENSMAUG00000015631	0.16615	0.582844		RPL36	ENSMAUG00000018691	1.60765	0.614042		LAMA1	ENSMAUG00000000452	-0.531946	0.0438814
COX7A2	ENSMAUG00000008392	0.148511	0.0793483		RPL36A	ENSMAUG00000021261	0.114637	0.313724		LAMA2	ENSMAUG00000010027	-0.128381	0.158743
COX7A2L	ENSMAUG00000018428	0.0943467	0.245887		RPL37A	ENSMAUG00000020042	0.188752	0.0681635		LAMA3	ENSMAUG00000014571	-0.483449	0.151482
COX7B	ENSMAUG00000008542	0.205201	0.0253927		RPL6	ENSMAUG00000008637	0.105254	0.406311		LAMA4	ENSMAUG00000008791	-0.124424	0.351604
COX8A	ENSMAUG00000015109	0.259486	0.00777251		RPL7A	ENSMAUG00000016150	0.136373	0.154916		LAMA5	ENSMAUG00000015139	-0.160244	0.148904
COX8C	ENSMAUG00000002250	0.191073	0.65645		RPL9	ENSMAUG00000012459	0.144193	0.504861		LAMB1	ENSMAUG00000012784	-0.282005	0.0299609
CS	ENSMAUG00000020525	0.0987517	0.122827		RPLP0	ENSMAUG00000000601	0.189784	0.320891		LAMC1	ENSMAUG00000014238	-0.123183	0.137961
CYC1	ENSMAUG00000011170	0.158021	0.0924286		RPLP1	ENSMAUG00000001413	1.32725	0.138434		SDC1	ENSMAUG00000007825	-0.391444	0.31029
DLD	ENSMAUG00000015436	0.0294439	0.737733		RPS15A	ENSMAUG00000016548	0.120432	0.216915		SPP1	ENSMAUG00000018138	-0.488105	0.171476
FH	ENSMAUG00000003139	0.0339288	0.639805		RPS16	ENSMAUG00000016611	0.182165	0.11118		SV2C	ENSMAUG00000005414	-0.384256	0.0199657
GPR37	ENSMAUG00000012922	0.0945433	0.351842		RPS17	ENSMAUG00000017234	0.125728	0.23048		THBS2	ENSMAUG00000011839	-0.142473	0.348176
IDH1	ENSMAUG00000001360	0.0690626	0.464522		RPS28	ENSMAUG00000014417	0.541408	0.0283951		THBS3	ENSMAUG00000020310	-0.241349	0.097212
IDH2	ENSMAUG00000019935	0.119646	0.237814		RPS3	ENSMAUG00000006329	0.269783	0.690848		THBS4	ENSMAUG00000009316	-0.141004	0.558782
LHPP	ENSMAUG00000008910	0.21428	0.0327903		RPS4X	ENSMAUG00000013223	0.101223	0.218802		TNR	ENSMAUG00000000637	-0.10926	0.369825
LRRK2	ENSMAUG00000013795	0.160144	0.120446		RPS5	ENSMAUG00000010731	0.215336	0.031972		TNXB	ENSMAUG00000019386	-0.117544	0.326083
MT-ND4	ENSMAUG00000000028	0.0829677	0.521251		RPS6	ENSMAUG00000014284	0.121908	0.409034		VTN	ENSMAUG00000001433	-0.348777	0.0791476
NDUFA2	ENSMAUG00000015843	0.0716529	0.658306		RPS7	ENSMAUG00000000660	1.14348	0.61566		VWF	ENSMAUG00000009725	-0.646172	0.0783129
NDUFA3	ENSMAUG00000015459	0.400132	0.107711		RPS9	ENSMAUG00000016938	0.151	0.110938
NDUFA4	ENSMAUG00000017004	0.23617	0.00725439		SUCLG2	ENSMAUG00000021321	0.291646	0.00307861
NDUFA7	ENSMAUG00000011679	0.198719	0.0235508		UBA52	ENSMAUG00000002775	0.10522	0.309834
NDUFA8	ENSMAUG00000016103	0.127335	0.090799
NDUFB10	ENSMAUG00000007967	0.117809	0.111028
NDUFB2	ENSMAUG00000000340	0.172536	0.0545292
NDUFB3	ENSMAUG00000017559	0.0764914	0.363291
NDUFB4	ENSMAUG00000013448	0.121786	0.206426
NDUFB5	ENSMAUG00000017888	0.0873128	0.316446
NDUFB6	ENSMAUG00000019164	0.107906	0.220618
NDUFB7	ENSMAUG00000000462	0.583504	0.0330446
NDUFB8	ENSMAUG00000020368	0.120399	0.186583
NDUFB9	ENSMAUG00000013523	0.169203	0.0324828
NDUFC1	ENSMAUG00000017283	0.195774	0.0982055
NDUFC2	ENSMAUG00000009562	0.132631	0.099437
NDUFS2	ENSMAUG00000011712	0.0807965	0.174873
NDUFS6	ENSMAUG00000011653	0.0868092	0.351768
NDUFS7	ENSMAUG00000021038	0.124402	0.142724
NDUFS8	ENSMAUG00000017880	0.0906937	0.25471
NDUFV2	ENSMAUG00000008707	0.0702509	0.350673
NDUFV3	ENSMAUG00000020188	0.0592932	0.562629
OGDH	ENSMAUG00000021826	0.150582	0.0564928
OGDHL	ENSMAUG00000000353	0.0529029	0.408798
PARK7	ENSMAUG00000014799	0.0830512	0.280744
PC	ENSMAUG00000017333	0.0802493	0.320943
PCK1	ENSMAUG00000020497	0.0897362	0.94984
PCK2	ENSMAUG00000013705	0.0462997	0.54831
PDHA1	ENSMAUG00000002413	0.0401798	0.660887
PDHB	ENSMAUG00000004888	0.0500008	0.395259
PINK1	ENSMAUG00000017256	0.151029	0.0283465
PPA1	ENSMAUG00000008277	0.082051	0.260766
PPA2	ENSMAUG00000011715	0.106662	0.174808
PRKN	ENSMAUG00000002219	0.286898	0.0129261
SDHA	ENSMAUG00000020809	0.0431245	0.509873
SDHB	ENSMAUG00000015748	0.0237035	0.716635
SDHD	ENSMAUG00000018722	0.0848637	0.177747
SEPTIN5	ENSMAUG00000014786	0.115709	0.11246
SLC25A5	ENSMAUG00000020049	0.130165	0.200566
SUCLA2	ENSMAUG00000008374	0.0266126	0.791193
SUCLG2	ENSMAUG00000021321	0.291646	0.00307861
TH	ENSMAUG00000018721	0.236013	0.636308
UCHL1	ENSMAUG00000000614	0.158273	0.0540271
UQCR11	ENSMAUG00000015805	0.197531	0.0633564
UQCRB	ENSMAUG00000017049	0.0702225	0.356287
UQCRFS1	ENSMAUG00000016767	0.0787082	0.269776
UQCRQ	ENSMAUG00000021198	0.100531	0.274898
VDAC1	ENSMAUG00000001063	0.11389	0.117616

## Sheet: Females - SB12 vs. SV
Core enrichment genes associated with the main enriched KEGG pathways identified by GSEA in the contrast between females Sham-infected - B12 and females Sham-infected - vehicle
Mitochondrial energy metabolism and neurodegenerative diseases					Bioenergetic demand					Neuronal plasticity
Enriched KEGG pathways - inhibited: Alzheimer's disease; Citrate cycle, TCA cycle; Huntington's disease; Oxidative phosphorylation pathways; Parkinson's disease					Enriched KEGG pathways - inhibited : Aminoacyl tRNA Biosynthesis; Base excision repair; DNA replication; Proteasome; Purine metabolism; Ribosome; Spliceosome					Enriched KEGG pathways - activated: Calcium signaling pathway; Hedgehog signaling pathway; Long-term depression; Long term potentiation; TGF-beta signaling pathway. Enriched KEGG pathways - inhibited: Neuroactive ligand-receptor interaction; Snare interactions in vesicular transport;
Human gene symbol	M. auratus gene ID	log2 Fold change	P value		Human gene symbol	M. auratus gene ID	log2 Fold change	P value		Human gene symbol	M. auratus gene ID	log2 Fold change	P value
ACLY	ENSMAUG00000000465	0.00845165	0.831658		AARS1	ENSMAUG00000021342	-0.0516693	0.222556		ACVR1	ENSMAUG00000018472	0.0449738	0.697086
ACO1	ENSMAUG00000021408	-0.0693066	0.156089		AARS2	ENSMAUG00000015966	-0.0430714	0.542246		ACVR1C	ENSMAUG00000018969	0.257788	0.0498247
ACO2	ENSMAUG00000007598	-0.0595444	0.187553		ACIN1	ENSMAUG00000000504	-0.00372545	0.944972		ACVRL1	ENSMAUG00000012242	0.0382684	0.780978
AP2A1	ENSMAUG00000005134	-0.0281997	0.46469		ADCY2	ENSMAUG00000014023	-0.0173166	0.635303		ADCY1	ENSMAUG00000011766	0.255649	0.10142
AP2A2	ENSMAUG00000019921	-0.0752891	0.0675865		ADCY3	ENSMAUG00000019311	-0.0759885	0.210517		ADCY9	ENSMAUG00000015997	0.144687	0.0140309
AP2M1	ENSMAUG00000021138	-0.0939903	0.0380978		ADCY4	ENSMAUG00000001040	-0.111366	0.416151		ADORA2A	ENSMAUG00000015630	-0.270625	0.18047
AP2S1	ENSMAUG00000019505	-0.0333591	0.626079		ADCY6	ENSMAUG00000011342	-0.01424	0.817718		ADORA2B	ENSMAUG00000002103	0.086888	0.510018
APBB1	ENSMAUG00000001261	-0.028623	0.470606		ADCY7	ENSMAUG00000005638	-0.0985051	0.437748		ADRA1B	ENSMAUG00000013092	-0.129524	0.407241
APH1A	ENSMAUG00000009007	-0.0314943	0.610345		ADCY8	ENSMAUG00000014347	-0.110521	0.139642		ADRA1D	ENSMAUG00000009086	0.0791598	0.294259
ATP12A	ENSMAUG00000020518	-0.961135	0.622001		ADSL	ENSMAUG00000001074	-0.0619804	0.499078		ADRA2A	ENSMAUG00000011850	-0.259658	0.0391983
ATP4A	ENSMAUG00000020584	-0.162883	0.350827		AK1	ENSMAUG00000019632	-0.125521	0.0100104		ADRA2C	ENSMAUG00000010360	-0.135158	0.220311
ATP4B	ENSMAUG00000012880	-1.43799	0.683791		AK5	ENSMAUG00000007957	-0.0307324	0.545116		ADRB3	ENSMAUG00000019598	1.41427	0.688424
ATP5F1A	ENSMAUG00000019838	-0.0363533	0.475482		ALLC	ENSMAUG00000015102	-0.6337	0.640547		APLNR	ENSMAUG00000001352	-0.353762	0.395037
ATP5F1C	ENSMAUG00000014343	-0.0775872	0.160248		ALYREF	ENSMAUG00000020552	-0.0718209	0.347496		ATP2A3	ENSMAUG00000005976	0.120211	0.483344
ATP5F1D	ENSMAUG00000007050	-0.0520894	0.34859		AMPD3	ENSMAUG00000009879	-0.0764884	0.229283		ATP2B1	ENSMAUG00000009310	0.156834	0.0209245
ATP5F1E	ENSMAUG00000011798	-0.151695	0.0409328		AQR	ENSMAUG00000021062	0.0478054	0.401943		ATP2B2	ENSMAUG00000009448	0.105827	0.0685264
ATP5MC3	ENSMAUG00000017685	-0.0473342	0.314184		ATIC	ENSMAUG00000013188	-0.077155	0.173096		AVPR1B	ENSMAUG00000000787	-4.51969	0.00110224
ATP5MF	ENSMAUG00000018419	-0.135762	0.0489341		BCAS2	ENSMAUG00000013855	-0.0736961	0.267544		AVPR2	ENSMAUG00000001098	-0.403155	0.521751
ATP5PB	ENSMAUG00000014472	-0.0311385	0.589043		BUD31	ENSMAUG00000016405	0.0201321	0.8612		BDKRB2	ENSMAUG00000001253	-0.838611	0.0984168
ATP5PD	ENSMAUG00000000650	-0.0931147	0.173701		CANT1	ENSMAUG00000012573	-0.0820365	0.253346		BET1L	ENSMAUG00000003061	-0.116109	0.121509
ATP5PF	ENSMAUG00000020461	-0.0396003	0.508078		CARS1	ENSMAUG00000019542	-0.0355315	0.549528		BMP2	ENSMAUG00000015083	0.0505042	0.820935
ATP6V0A1	ENSMAUG00000002684	-0.0417138	0.330967		CARS2	ENSMAUG00000020333	-0.0935357	0.327762		BMP4	ENSMAUG00000001775	0.104665	0.612143
ATP6V0A2	ENSMAUG00000012274	-0.0853013	0.564952		CCDC12	ENSMAUG00000008879	0.0568878	0.561363		BMP5	ENSMAUG00000018758	0.356108	0.0554862
ATP6V0A4	ENSMAUG00000022166	-0.190639	0.225355		CDC5L	ENSMAUG00000013120	-0.0606754	0.291131		BMP6	ENSMAUG00000011185	0.418837	0.0716361
ATP6V0E1	ENSMAUG00000013929	-0.0671255	0.480573		CHERP	ENSMAUG00000015856	-0.0389016	0.452008		BMP7	ENSMAUG00000015344	0.0533144	0.614277
ATP6V0E2	ENSMAUG00000020438	-0.0333623	0.487204		CRNKL1	ENSMAUG00000020764	0.0425233	0.541826		BMPR1A	ENSMAUG00000016176	0.104177	0.0444749
ATP6V1B2	ENSMAUG00000018466	-0.0626607	0.180046		CWC15	ENSMAUG00000011686	-0.080466	0.249266		BMPR2	ENSMAUG00000009115	0.126935	0.0814052
ATP6V1C1	ENSMAUG00000018399	-0.0721209	0.248839		DARS1	ENSMAUG00000017400	-0.107883	0.074109		BNIP1	ENSMAUG00000016525	-0.0283706	0.734136
ATP6V1E1	ENSMAUG00000010551	-0.0604871	0.221733		DARS2	ENSMAUG00000002392	-0.0274917	0.817063		BRAF	ENSMAUG00000016066	0.14702	0.0260518
ATP6V1E2	ENSMAUG00000016357	-0.246106	0.645726		DDX23	ENSMAUG00000012336	-0.00308274	0.949344		BRS3	ENSMAUG00000019309	-0.490872	0.397725
ATP6V1G2	ENSMAUG00000016081	-0.114412	0.0194481		DDX39B	ENSMAUG00000008059	-0.071355	0.0716061		CACNA1A	ENSMAUG00000008037	0.0589711	0.265567
BACE2	ENSMAUG00000018970	-0.0346814	0.880251		DDX46	ENSMAUG00000003267	0.0458024	0.423785		CACNA1B	ENSMAUG00000008461	0.0474217	0.34602
BAD	ENSMAUG00000013587	-0.133069	0.0728883		DDX5	ENSMAUG00000008696	0.0220625	0.595894		CACNA1C	ENSMAUG00000017632	0.107441	0.085212
BAX	ENSMAUG00000015297	-0.0625886	0.508034		DGUOK	ENSMAUG00000008795	-0.153523	0.221501		CACNA1D	ENSMAUG00000020160	0.0597563	0.438022
BBC3	ENSMAUG00000009202	-0.0374151	0.810746		DHX15	ENSMAUG00000011535	0.0329487	0.478312		CACNA1E	ENSMAUG00000022174	0.181318	0.0248091
BDNF	ENSMAUG00000021360	-0.0888166	0.257296		DHX16	ENSMAUG00000001696	-0.0793747	0.37164		CACNA1G	ENSMAUG00000015351	0.0796693	0.466124
CACNA1F	ENSMAUG00000021438	-0.576289	0.202029		DHX38	ENSMAUG00000006330	-0.0917775	0.188896		CACNA1H	ENSMAUG00000017437	0.184431	0.179097
CACNA1S	ENSMAUG00000004666	-0.122144	0.653605		DHX8	ENSMAUG00000019891	-0.0364847	0.642861		CACNA1I	ENSMAUG00000008968	0.0543447	0.397397
CALM3	ENSMAUG00000011584	-0.0486818	0.256818		DNA2	ENSMAUG00000002986	-0.217156	0.658967		CALCR	ENSMAUG00000001795	-1.23492	0.315719
CASP7	ENSMAUG00000010943	-0.0697954	0.735814		EARS2	ENSMAUG00000012883	-0.12355	0.145764		CALCRL	ENSMAUG00000016850	-0.120413	0.227257
CASP8	ENSMAUG00000018476	-0.383587	0.270211		EFTUD2	ENSMAUG00000021178	-0.0443171	0.406924		CALML5	ENSMAUG00000008151	2.97668	0.171932
CDK5	ENSMAUG00000016278	-0.133678	0.00711202		EIF4A3	ENSMAUG00000012955	-0.0790119	0.143862		CAMK2A	ENSMAUG00000019808	0.0586502	0.305367
CDK5R1	ENSMAUG00000021140	-0.0431257	0.349246		ENPP1	ENSMAUG00000018561	-0.0987349	0.441619		CAMK2B	ENSMAUG00000019715	0.0531195	0.36696
CHP1	ENSMAUG00000001469	-0.0431854	0.394349		ENPP3	ENSMAUG00000001245	-0.735197	0.512328		CAMK4	ENSMAUG00000020936	0.206602	0.132081
CLTA	ENSMAUG00000019878	-0.0352092	0.492444		ENTPD1	ENSMAUG00000001755	-0.0475723	0.614983		CCKAR	ENSMAUG00000020673	2.04304	0.449393
CLTB	ENSMAUG00000011741	-0.0929214	0.109962		ENTPD2	ENSMAUG00000013094	-0.0633643	0.448162		CCKBR	ENSMAUG00000017780	-0.187223	0.0374158
COX11	ENSMAUG00000008185	-0.0994636	0.208924		ENTPD4	ENSMAUG00000012065	-0.0279593	0.531878		CHP2	ENSMAUG00000013421	0.287866	0.459548
COX15	ENSMAUG00000019550	-0.0360171	0.545658		ENTPD6	ENSMAUG00000001297	-0.0641487	0.169416		CHRD	ENSMAUG00000019283	0.0218937	0.662891
COX17	ENSMAUG00000020841	-0.157562	0.198361		FARSA	ENSMAUG00000009188	-0.027359	0.683778		CHRM2	ENSMAUG00000003440	0.0932212	0.645749
COX4I1	ENSMAUG00000008155	-0.126601	0.0643595		FARSB	ENSMAUG00000017805	-0.0805179	0.402456		CHRM4	ENSMAUG00000007510	-0.236442	0.0373639
COX4I2	ENSMAUG00000002542	-0.281511	0.324585		FAU	ENSMAUG00000014406	-0.112671	0.106068		CHRM5	ENSMAUG00000021233	0.052132	0.581395
COX5B	ENSMAUG00000017662	-0.0622341	0.352345		FEN1	ENSMAUG00000012401	-0.0624661	0.722611		CHRNA2	ENSMAUG00000009044	-0.320638	0.501549
COX6A2	ENSMAUG00000008662	-0.0736447	0.981709		FHIT	ENSMAUG00000008107	-0.130541	0.589663		CHRNA4	ENSMAUG00000001465	-0.103383	0.339957
COX6B1	ENSMAUG00000011240	-0.141227	0.0367608		GARS1	ENSMAUG00000016852	-0.07744	0.0650614		CHRNA6	ENSMAUG00000006256	-1.27548	0.385131
COX7A2	ENSMAUG00000008392	-0.147514	0.0246802		GDA	ENSMAUG00000009710	-0.0690821	0.119414		CHRNA9	ENSMAUG00000009308	-0.382012	0.683872
COX7A2L	ENSMAUG00000018428	-0.0658515	0.241337		GMPR2	ENSMAUG00000015227	-0.086122	0.166348		CHRNE	ENSMAUG00000007049	-0.274824	0.559744
COX7B	ENSMAUG00000008542	-0.11914	0.111226		GUCY1B1	ENSMAUG00000000232	-0.0650384	0.253433		CNR2	ENSMAUG00000009347	-0.720864	0.805744
COX8A	ENSMAUG00000015109	-0.0529039	0.394619		GUCY2C	ENSMAUG00000014165	-0.581445	0.229376		CREBBP	ENSMAUG00000010329	0.065348	0.3138
CREB3	ENSMAUG00000013011	-0.139026	0.0557185		GUCY2D	ENSMAUG00000020496	-0.163649	0.673108		CRHR1	ENSMAUG00000016666	0.189809	0.341423
CREB3L2	ENSMAUG00000008546	-0.117599	0.350133		GUK1	ENSMAUG00000022283	-0.0676866	0.315948		CSNK1A1	ENSMAUG00000001051	0.0791793	0.0542104
CREB3L4	ENSMAUG00000007210	-0.46378	0.766563		HARS1	ENSMAUG00000015021	-0.00811509	0.879169		CSNK1G1	ENSMAUG00000020738	0.0599973	0.354892
CS	ENSMAUG00000020525	-0.0728831	0.107429		HMGB1P1	ENSMAUG00000019451	-0.0245889	0.853982		CUL1	ENSMAUG00000008868	0.0310068	0.453342
CYC1	ENSMAUG00000011170	-0.111999	0.0746003		HNRNPA1	ENSMAUG00000019184	-0.0163662	0.72194		CYSLTR1	ENSMAUG00000016351	-0.227521	0.69594
DCTN1	ENSMAUG00000008474	-0.030904	0.501345		HNRNPK	ENSMAUG00000015268	-0.0126697	0.785173		CYSLTR2	ENSMAUG00000008735	0.0863216	0.855589
DCTN2	ENSMAUG00000013335	-0.0353698	0.40927		HNRNPU	ENSMAUG00000008842	0.0150451	0.686781		DCN	ENSMAUG00000021986	0.121506	0.391669
DLAT	ENSMAUG00000014831	-0.00884535	0.873495		HSPA1L	ENSMAUG00000015361	-0.0388461	0.622431		DHH	ENSMAUG00000013999	0.259527	0.469701
DLD	ENSMAUG00000015436	0.000111107	0.998297		HSPA2	ENSMAUG00000003987	0.0265187	0.69961		DRD2	ENSMAUG00000011091	-0.117606	0.372916
DLG4	ENSMAUG00000019871	-0.0284164	0.475648		IARS1	ENSMAUG00000018695	-0.0284094	0.556801		DRD4	ENSMAUG00000002107	-0.922687	0.140745
DLST	ENSMAUG00000000864	-0.0228826	0.607368		IMPDH1	ENSMAUG00000000330	-0.106181	0.0697519		E2F4	ENSMAUG00000001090	0.0346598	0.743063
DNAL4	ENSMAUG00000006203	-0.0394448	0.538025		IMPDH2	ENSMAUG00000006873	-0.0303111	0.686005		E2F5	ENSMAUG00000013104	0.119469	0.256966
EIF2AK3	ENSMAUG00000000558	-0.0773135	0.266637		ISY1	ENSMAUG00000008793	-0.0416353	0.596922		EDNRA	ENSMAUG00000016677	0.242721	0.160256
ERN1	ENSMAUG00000021846	-0.0877784	0.630402		ITPA	ENSMAUG00000021384	-0.0195062	0.84702		EDNRB	ENSMAUG00000014682	0.137773	0.132942
FADD	ENSMAUG00000017656	-0.18297	0.228957		LARS1	ENSMAUG00000003063	-0.00898325	0.868164		EP300	ENSMAUG00000004380	0.0786983	0.210965
FH	ENSMAUG00000003139	-0.0442379	0.453117		LARS2	ENSMAUG00000014868	-0.0120382	0.858501		ERBB2	ENSMAUG00000021280	0.172	0.425669
GAPDH	ENSMAUG00000001414	-0.0664411	0.314715		LIG1	ENSMAUG00000012577	-0.0402737	0.447963		ERBB3	ENSMAUG00000015213	0.264775	0.0180102
GRIN2D	ENSMAUG00000015271	-0.0524048	0.563992		LSM2	ENSMAUG00000021966	-0.111401	0.443403		ERBB4	ENSMAUG00000021336	0.124809	0.272668
HAP1	ENSMAUG00000015239	-0.166456	0.023244		LSM7	ENSMAUG00000009276	-0.17083	0.109978		F2	ENSMAUG00000009414	-0.122366	0.291672
HDAC2	ENSMAUG00000020410	-0.0859258	0.184128		LSM8	ENSMAUG00000015356	-0.0709023	0.696032		F2RL2	ENSMAUG00000015710	-0.519083	0.504272
HSD17B10	ENSMAUG00000012984	-0.26193	0.0241368		MAGOH	ENSMAUG00000016008	-0.12959	0.297771		FST	ENSMAUG00000008573	0.363622	0.393923
IDH1	ENSMAUG00000001360	-0.0599958	0.408957		MAGOHB	ENSMAUG00000007271	0.00111101	0.991475		GABRA3	ENSMAUG00000008354	-0.0963857	0.280615
IDH2	ENSMAUG00000019935	-0.0311	0.61867		MARS1	ENSMAUG00000011482	-0.030016	0.609122		GABRD	ENSMAUG00000010719	-0.119365	0.150401
IDH3B	ENSMAUG00000020105	0.00164293	0.977175		MCM2	ENSMAUG00000008722	-0.193661	0.0871612		GABRE	ENSMAUG00000001350	-0.597232	0.215838
IFT57	ENSMAUG00000001803	-0.0873641	0.235575		MCM3	ENSMAUG00000012859	-0.0742763	0.600537		GABRQ	ENSMAUG00000011778	-0.097894	0.267558
IL1B	ENSMAUG00000017477	-0.524048	0.458248		MCM4	ENSMAUG00000018869	-0.0399933	0.646039		GALR3	ENSMAUG00000019657	-1.22641	0.279148
LHPP	ENSMAUG00000008910	-0.0588965	0.334691		MCM5	ENSMAUG00000020308	-0.0819147	0.437839		GDF6	ENSMAUG00000013204	0.506067	0.35596
LPL	ENSMAUG00000017512	-0.0335674	0.708914		MCM6	ENSMAUG00000000085	-0.0610449	0.396991		GDF7	ENSMAUG00000011905	0.0202961	0.965037
MAPK3	ENSMAUG00000012073	-0.100913	0.012981		MCM7	ENSMAUG00000013968	-0.203105	0.0148942		GHR	ENSMAUG00000000862	-0.0978779	0.215614
MDH1	ENSMAUG00000018086	-0.0971144	0.0433641		NARS1	ENSMAUG00000016087	-0.0515432	0.452317		GIPR	ENSMAUG00000021032	-0.335609	0.0786155
MME	ENSMAUG00000005415	-0.0298767	0.873916		NCBP1	ENSMAUG00000020583	-0.0141127	0.81381		GLI2	ENSMAUG00000008873	0.196505	0.332678
MT-ND4	ENSMAUG00000000028	-0.0438724	0.441317		NCBP2	ENSMAUG00000021481	-0.0645383	0.297526		GLRA1	ENSMAUG00000001329	-0.199151	0.625925
NCSTN	ENSMAUG00000019880	-0.0507595	0.307168		NEIL1	ENSMAUG00000017019	-0.0832015	0.34015		GLRA2	ENSMAUG00000020064	-0.116548	0.0837719
NDUFA1	ENSMAUG00000000368	-0.0365067	0.661659		NME3	ENSMAUG00000008485	-0.165253	0.028801		GNA12	ENSMAUG00000007824	0.059939	0.203581
NDUFA10	ENSMAUG00000015249	-0.105802	0.0197442		NME6	ENSMAUG00000022038	-0.129789	0.501497		GNA13	ENSMAUG00000007230	0.0351365	0.456863
NDUFA11	ENSMAUG00000021572	-0.157592	0.0445583		NME7	ENSMAUG00000015900	-0.134961	0.217046		GNA14	ENSMAUG00000010242	0.130315	0.580057
NDUFA2	ENSMAUG00000015843	-0.0372404	0.803074		NPR1	ENSMAUG00000011600	-0.190425	0.152976		GNA15	ENSMAUG00000016578	0.156077	0.653209
NDUFA3	ENSMAUG00000015459	-0.108042	0.711275		NT5C	ENSMAUG00000015203	-0.133045	0.373482		GNAI3	ENSMAUG00000008210	0.0346288	0.576885
NDUFA4	ENSMAUG00000017004	-0.10746	0.058091		NT5C1B	ENSMAUG00000018395	-1.43799	0.683791		GOSR1	ENSMAUG00000014407	0.024845	0.721151
NDUFA7	ENSMAUG00000011679	-0.167455	0.0188736		NT5C2	ENSMAUG00000018081	-0.0418137	0.735901		GOSR2	ENSMAUG00000020222	0.000630627	0.990733
NDUFA8	ENSMAUG00000016103	-0.0728648	0.263477		NT5C3A	ENSMAUG00000012474	-0.0522278	0.450619		GRIA1	ENSMAUG00000022238	0.0300913	0.535791
NDUFA9	ENSMAUG00000000394	-0.0805983	0.189384		NT5M	ENSMAUG00000017068	-0.041098	0.58754		GRIA2	ENSMAUG00000015836	0.0962554	0.0196055
NDUFB10	ENSMAUG00000007967	-0.0891934	0.168367		NTHL1	ENSMAUG00000011440	-0.0111598	0.963054		GRIA3	ENSMAUG00000009295	0.0674966	0.18534
NDUFB2	ENSMAUG00000000340	-0.0361051	0.662905		NUDT2	ENSMAUG00000021656	-0.0878631	0.519715		GRID2	ENSMAUG00000001680	0.067866	0.449484
NDUFB3	ENSMAUG00000017559	-0.0276623	0.733431		NUDT5	ENSMAUG00000020126	-0.0590887	0.497384		GRIK4	ENSMAUG00000012098	-0.118485	0.111287
NDUFB4	ENSMAUG00000013448	-0.0678982	0.31647		NUDT9	ENSMAUG00000008475	-0.0274743	0.640456		GRIN2A	ENSMAUG00000009472	0.305624	0.000129991
NDUFB5	ENSMAUG00000017888	-0.1295	0.0624345		OGG1	ENSMAUG00000018353	-0.0227168	0.885721		GRIN2B	ENSMAUG00000010364	0.189999	0.0674014
NDUFB6	ENSMAUG00000019164	-0.115304	0.12049		PAPSS2	ENSMAUG00000007484	-0.115636	0.430372		GRIN2C	ENSMAUG00000019504	0.0468345	0.480249
NDUFB7	ENSMAUG00000000462	-0.21427	0.466853		PARP2	ENSMAUG00000016215	-0.082654	0.572343		GRIN3A	ENSMAUG00000021268	-0.153309	0.430189
NDUFB8	ENSMAUG00000020368	-0.170431	0.0243735		PARP3	ENSMAUG00000010154	-0.131256	0.450888		GRIN3B	ENSMAUG00000007769	-0.106281	0.615516
NDUFB9	ENSMAUG00000013523	-0.0981464	0.194992		PARS2	ENSMAUG00000022043	-0.0799371	0.399735		GRM1	ENSMAUG00000003741	0.165963	0.111009
NDUFC1	ENSMAUG00000017283	-0.0523237	0.649367		PCBP1	ENSMAUG00000009843	0.0090084	0.84314		GRM2	ENSMAUG00000008556	-0.114865	0.0901405
NDUFC2	ENSMAUG00000009562	-0.0464329	0.582932		PCNA	ENSMAUG00000010813	-0.129305	0.226801		GRM5	ENSMAUG00000001190	0.0641474	0.269147
NDUFS2	ENSMAUG00000011712	-0.0819335	0.153397		PDE11A	ENSMAUG00000021257	-0.341882	0.224338		GRPR	ENSMAUG00000020061	0.22298	0.444482
NDUFS3	ENSMAUG00000010036	-0.0586604	0.291835		PDE1B	ENSMAUG00000019170	-0.043523	0.379222		GSK3B	ENSMAUG00000015683	0.174774	0.00384476
NDUFS4	ENSMAUG00000008411	-0.0909049	0.209482		PDE3A	ENSMAUG00000022096	-0.0352298	0.81383		GUCY1A1	ENSMAUG00000018984	0.388402	0.0446098
NDUFS5	ENSMAUG00000017342	-0.128052	0.186217		PDE4A	ENSMAUG00000013828	-0.0179351	0.748125		GUCY1A2	ENSMAUG00000011689	0.301849	0.00167652
NDUFS6	ENSMAUG00000011653	-0.0567566	0.466973		PDE6A	ENSMAUG00000002281	-0.335608	0.350098		HCRTR1	ENSMAUG00000011268	-0.17926	0.779709
NDUFS7	ENSMAUG00000021038	-0.0778016	0.244053		PDE6B	ENSMAUG00000018594	-0.0386517	0.938172		HCRTR2	ENSMAUG00000008463	-0.3693	0.213481
NDUFS8	ENSMAUG00000017880	-0.084563	0.161677		PDE6C	ENSMAUG00000021967	-0.23005	0.821267		HHIP	ENSMAUG00000012341	0.313113	0.255888
NDUFV2	ENSMAUG00000008707	-0.0709246	0.27888		PDE7A	ENSMAUG00000001828	-0.0858106	0.35363		HRH1	ENSMAUG00000009874	-0.215343	0.112415
NDUFV3	ENSMAUG00000020188	-0.0532311	0.344855		PDE8B	ENSMAUG00000015472	-0.10264	0.119933		HRH2	ENSMAUG00000008111	0.0824515	0.489799
OGDH	ENSMAUG00000021826	-0.047036	0.211454		PDE9A	ENSMAUG00000001943	-0.0242772	0.784366		HRH3	ENSMAUG00000012652	-0.198449	0.0382877
OGDHL	ENSMAUG00000000353	-0.0833567	0.0882417		PHF5A	ENSMAUG00000017124	0.00367104	0.972056		HTR2B	ENSMAUG00000015125	-0.140667	0.773513
PARK7	ENSMAUG00000014799	-0.0921862	0.167742		PKLR	ENSMAUG00000012808	-0.999181	0.291865		HTR2C	ENSMAUG00000009530	-0.153986	0.291181
PC	ENSMAUG00000017333	-0.00810602	0.880173		PLRG1	ENSMAUG00000003101	-0.0408855	0.50267		ID1	ENSMAUG00000001378	0.167243	0.358426
PCK2	ENSMAUG00000013705	-0.151026	0.0368364		PNP	ENSMAUG00000015711	-0.127268	0.288931		ID3	ENSMAUG00000020929	0.0532183	0.684474
PDHA1	ENSMAUG00000002413	-0.0223404	0.586399		PNPT1	ENSMAUG00000013652	-0.0622329	0.40786		ID4	ENSMAUG00000001937	0.0610556	0.343514
PDHB	ENSMAUG00000004888	-0.0460033	0.413773		POLB	ENSMAUG00000002032	-0.0585353	0.404788		IFNG	ENSMAUG00000013690	1.2606	0.590174
POLR2D	ENSMAUG00000014518	-0.151583	0.172068		POLD1	ENSMAUG00000004006	-0.0211619	0.815649		IGF1	ENSMAUG00000020849	0.0438285	0.817447
POLR2F	ENSMAUG00000018586	-0.150399	0.0482368		POLD2	ENSMAUG00000008387	-0.0312611	0.738036		IHH	ENSMAUG00000014723	2.1938	0.454723
POLR2I	ENSMAUG00000001001	-0.1824	0.280513		POLD4	ENSMAUG00000016004	-0.145466	0.31035		INHBA	ENSMAUG00000021024	0.167808	0.337851
POLR2J	ENSMAUG00000013049	-0.107291	0.345027		POLE2	ENSMAUG00000001075	-0.0615172	0.667212		INHBB	ENSMAUG00000018944	0.179552	0.105637
POLR2L	ENSMAUG00000019023	-0.182674	0.0234442		POLE3	ENSMAUG00000000366	-0.0332666	0.572966		INHBC	ENSMAUG00000013085	0.33	0.349214
PPA1	ENSMAUG00000008277	-0.0804783	0.188932		POLE4	ENSMAUG00000002015	-0.128012	0.190283		INHBE	ENSMAUG00000008071	0.143476	0.774785
PPA2	ENSMAUG00000011715	-0.148657	0.0366404		POLL	ENSMAUG00000014674	-0.0364564	0.661711		ITPKB	ENSMAUG00000013424	0.0685144	0.342197
PPP3R2	ENSMAUG00000002415	-0.199426	0.647445		POLR1A	ENSMAUG00000008497	-0.0167439	0.82977		ITPR1	ENSMAUG00000016842	0.0919531	0.133601
PRKN	ENSMAUG00000002219	-0.0593791	0.413336		POLR1B	ENSMAUG00000010593	-0.0443459	0.640842		ITPR2	ENSMAUG00000012727	0.214843	0.00342343
PSEN2	ENSMAUG00000014629	-0.111298	0.083032		POLR1D	ENSMAUG00000001946	-0.0160327	0.797328		ITPR3	ENSMAUG00000019945	0.0707259	0.524321
PSENEN	ENSMAUG00000011553	-0.0435566	0.537804		POLR1H	ENSMAUG00000000386	-0.0484087	0.797812		KRAS	ENSMAUG00000017232	0.054674	0.303683
SDHA	ENSMAUG00000020809	0.000458107	0.991257		POLR2D	ENSMAUG00000014518	-0.151583	0.172068		LHCGR	ENSMAUG00000007411	0.285986	0.655347
SDHB	ENSMAUG00000015748	-0.0527163	0.346101		POLR2F	ENSMAUG00000018586	-0.150399	0.0482368		LPAR4	ENSMAUG00000014705	-0.255013	0.472615
SDHC	ENSMAUG00000010714	-0.0326009	0.654848		POLR2I	ENSMAUG00000001001	-0.1824	0.280513		LRP2	ENSMAUG00000007988	0.0658366	0.623964
SDHD	ENSMAUG00000018722	-0.0283361	0.624543		POLR2J	ENSMAUG00000013049	-0.107291	0.345027		LTB4R2	ENSMAUG00000006293	0.838149	0.0750477
SEPTIN5	ENSMAUG00000014786	-0.0968371	0.0407694		POLR2K	ENSMAUG00000010288	-0.0222477	0.827295		LTBP1	ENSMAUG00000011311	0.0390272	0.618461
SIN3A	ENSMAUG00000021800	-0.0490674	0.448881		POLR2L	ENSMAUG00000019023	-0.182674	0.0234442		LYN	ENSMAUG00000004454	0.0814248	0.427266
SLC18A2	ENSMAUG00000009506	-0.12631	0.357364		POLR3B	ENSMAUG00000010200	-0.0343801	0.644536		MC3R	ENSMAUG00000006998	-0.545966	0.358338
SLC25A4	ENSMAUG00000018790	-0.0548677	0.290808		POLR3H	ENSMAUG00000022215	-0.0966158	0.23061		MC4R	ENSMAUG00000016776	-0.103536	0.669828
SLC25A5	ENSMAUG00000020049	-0.132625	0.145937		POMP	ENSMAUG00000006509	-0.0610505	0.388152		MCHR1	ENSMAUG00000021927	-0.12239	0.341971
SNCA	ENSMAUG00000018763	-0.0567009	0.335401		PPAT	ENSMAUG00000018321	-0.0312995	0.711077		MYLK2	ENSMAUG00000011764	2.67216	0.434752
SOD1	ENSMAUG00000018610	-0.0824085	0.200363		PPIH	ENSMAUG00000016280	-0.0990921	0.291971		NMBR	ENSMAUG00000021278	-0.285395	0.394244
SUCLA2	ENSMAUG00000008374	0.00207056	0.97075		PPIL1	ENSMAUG00000008428	-0.0815929	0.193606		NODAL	ENSMAUG00000012281	1.12009	0.241525
SUCLG1	ENSMAUG00000020136	-0.0494517	0.381226		PQBP1	ENSMAUG00000013093	-0.111164	0.158122		NPY1R	ENSMAUG00000015765	-0.128567	0.167069
SUCLG2	ENSMAUG00000021321	-0.036171	0.549077		PRIM2	ENSMAUG00000009565	-0.138025	0.152295		NPY2R	ENSMAUG00000000596	-0.113321	0.541617
TBPL1	ENSMAUG00000003205	-0.0446379	0.615664		PRPF19	ENSMAUG00000012585	-0.050297	0.219757		NPY5R	ENSMAUG00000015685	-0.143744	0.211464
TH	ENSMAUG00000018721	-0.111198	0.771221		PRPF31	ENSMAUG00000011581	-0.0589614	0.440611		NRAS	ENSMAUG00000019927	0.0779107	0.805782
TNFRSF1A	ENSMAUG00000002877	-0.0582016	0.631018		PRPF38A	ENSMAUG00000018029	0.0542825	0.778752		NTSR1	ENSMAUG00000017871	0.180038	0.31505
TP53	ENSMAUG00000022241	-0.100082	0.27018		PRPF4	ENSMAUG00000018022	0.00783587	0.884554		NTSR2	ENSMAUG00000016529	-0.131164	0.0420789
UBA1	ENSMAUG00000012516	-0.0361251	0.317857		PRPF40A	ENSMAUG00000020074	0.0513915	0.428456		OPRL1	ENSMAUG00000020165	-0.140174	0.0533669
UBA7	ENSMAUG00000021773	-0.272463	0.106702		PRPF40B	ENSMAUG00000012461	-0.0342076	0.516434		OXTR	ENSMAUG00000020582	0.07407	0.656651
UBE2J2	ENSMAUG00000011460	-0.0432725	0.478295		PRPF6	ENSMAUG00000013969	0.00517956	0.926456		P2RX2	ENSMAUG00000011915	-1.27921	0.23082
UBE2L6	ENSMAUG00000016558	-0.285354	0.51942		PRPF8	ENSMAUG00000014365	-0.0606201	0.149527		P2RX5	ENSMAUG00000008683	-0.424029	0.536781
UCHL1	ENSMAUG00000000614	-0.110637	0.00719396		PRUNE1	ENSMAUG00000000710	-0.057751	0.449879		PDE1C	ENSMAUG00000013839	0.193371	0.233841
UCP1	ENSMAUG00000001700	-1.0168	0.598799		PSMA1	ENSMAUG00000008437	-0.058508	0.412822		PDGFRB	ENSMAUG00000012051	0.0525018	0.482458
UQCR11	ENSMAUG00000015805	-0.0814243	0.219828		PSMA2	ENSMAUG00000009719	-0.0400616	0.492036		PHKA2	ENSMAUG00000001285	0.0476163	0.417184
UQCRB	ENSMAUG00000017049	-0.130958	0.0543226		PSMA3	ENSMAUG00000020737	-0.0150147	0.797148		PITX2	ENSMAUG00000000316	0.618927	0.81432
UQCRC1	ENSMAUG00000010209	-0.126995	0.0171004		PSMA4	ENSMAUG00000011209	-0.0975592	0.181851		PLA2G12B	ENSMAUG00000009563	0.268396	0.875436
UQCRC2	ENSMAUG00000014433	-0.0545267	0.330217		PSMA5	ENSMAUG00000019226	-0.0388872	0.595218		PLA2G2C	ENSMAUG00000001804	0.105054	0.869933
UQCRFS1	ENSMAUG00000016767	-0.0510502	0.300142		PSMA6	ENSMAUG00000019916	-0.072077	0.269073		PLA2G3	ENSMAUG00000022002	0.203148	0.644113
UQCRQ	ENSMAUG00000021198	-0.116326	0.0803512		PSMA7	ENSMAUG00000011223	-0.146395	0.0641045		PLA2G4A	ENSMAUG00000011857	0.068739	0.64036
VDAC1	ENSMAUG00000001063	-0.0418036	0.409992		PSMA8	ENSMAUG00000017223	-2.03119	0.179623		PLA2G5	ENSMAUG00000011239	0.233727	0.694555
VDAC2	ENSMAUG00000006909	-0.0558576	0.274676		PSMB1	ENSMAUG00000016104	-0.108429	0.07328		PLA2G6	ENSMAUG00000021718	0.0492244	0.566533
					PSMB11	ENSMAUG00000017123	-0.121724	0.902344		PLCB1	ENSMAUG00000015228	0.064521	0.221647
					PSMB2	ENSMAUG00000021796	-0.126696	0.0476043		PLCB2	ENSMAUG00000006285	0.12617	0.417086
					PSMB4	ENSMAUG00000015230	-0.0465304	0.469715		PLCB4	ENSMAUG00000012557	0.0865123	0.310348
					PSMB6	ENSMAUG00000020184	-0.159298	0.0109188		PLCD1	ENSMAUG00000008577	0.0551405	0.499466
					PSMB7	ENSMAUG00000009541	-0.0152603	0.832668		PLCD3	ENSMAUG00000001235	0.0671299	0.509408
					PSMC1	ENSMAUG00000019744	-0.0636762	0.377093		PLCD4	ENSMAUG00000001125	0.0522226	0.473099
					PSMC2	ENSMAUG00000008073	-0.0604281	0.414751		PLN	ENSMAUG00000007750	0.217243	0.713262
					PSMC3	ENSMAUG00000007346	-0.072195	0.217371		PPP1CB	ENSMAUG00000015252	0.0859474	0.134539
					PSMC4	ENSMAUG00000009116	-0.0673976	0.185286		PPP1R12A	ENSMAUG00000021712	0.0997189	0.0568794
					PSMC5	ENSMAUG00000012661	-0.0841042	0.111097		PPP1R17	ENSMAUG00000009624	0.466603	0.00898047
					PSMC6	ENSMAUG00000007830	-0.0614546	0.378289		PPP2R1B	ENSMAUG00000022093	0.0518946	0.412305
					PSMD11	ENSMAUG00000019073	-0.0531621	0.286463		PPP3CA	ENSMAUG00000012231	0.143591	0.0347586
					PSMD12	ENSMAUG00000013274	-0.0455406	0.558223		PPP3CB	ENSMAUG00000004509	0.0527113	0.392431
					PSMD14	ENSMAUG00000014021	-0.0391304	0.539108		PPP3R1	ENSMAUG00000014614	0.0528177	0.380899
					PSMD2	ENSMAUG00000014316	-0.0183426	0.716406		PRKACB	ENSMAUG00000002887	0.0657951	0.192272
					PSMD3	ENSMAUG00000014277	-0.0151875	0.746793		PRKCA	ENSMAUG00000008808	0.15856	0.0298751
					PSMD4	ENSMAUG00000019832	-0.146197	0.00799221		PRKG1	ENSMAUG00000009610	0.104966	0.308198
					PSMD6	ENSMAUG00000012233	-0.103103	0.0793383		PRKG2	ENSMAUG00000018572	0.068898	0.715275
					PSMD7	ENSMAUG00000012063	-0.128325	0.0537275		PRKX	ENSMAUG00000016058	0.27987	0.000522291
					PSMD8	ENSMAUG00000018967	-0.0468683	0.611639		PRLR	ENSMAUG00000016749	-0.431617	0.464949
					PSME1	ENSMAUG00000015111	-0.12458	0.149393		PTAFR	ENSMAUG00000008850	0.0578289	0.584673
					PSME2	ENSMAUG00000015092	-0.0405041	0.603302		PTCH2	ENSMAUG00000016604	0.0840573	0.275477
					PSMF1	ENSMAUG00000012408	-0.0254147	0.720422		PTGER1	ENSMAUG00000012479	0.078153	0.661613
					QARS1	ENSMAUG00000022218	-0.0686273	0.200324		PTGER3	ENSMAUG00000011005	-0.399122	0.619245
					RARS1	ENSMAUG00000008565	-0.0419668	0.536581		PTGFR	ENSMAUG00000013922	1.13141	0.0711353
					RBM17	ENSMAUG00000019247	-0.0445326	0.46339		PTH2R	ENSMAUG00000020947	-0.204484	0.592427
					RBM22	ENSMAUG00000001133	-0.0361485	0.591358		RAB23	ENSMAUG00000004955	0.140629	0.0830352
					RBM8A	ENSMAUG00000016783	-0.0849771	0.221438		RAPGEF3	ENSMAUG00000018637	0.045613	0.494906
					RBMX	ENSMAUG00000019654	-0.0627827	0.361475		ROCK1	ENSMAUG00000011662	0.163268	0.0109656
					RFC1	ENSMAUG00000015509	-0.0332282	0.635286		RPS6KA2	ENSMAUG00000002007	0.0616758	0.406674
					RFC3	ENSMAUG00000016464	-0.0758867	0.583668		RPS6KA3	ENSMAUG00000015390	0.103874	0.131175
					RFC4	ENSMAUG00000004500	-0.130547	0.383792		RPS6KB1	ENSMAUG00000012729	0.0216262	0.891397
					RFC5	ENSMAUG00000008750	-0.136928	0.469647		RPS6KB2	ENSMAUG00000017230	0.0762436	0.429044
					RNASEH2A	ENSMAUG00000008286	-0.147401	0.436981		RXFP2	ENSMAUG00000017558	-0.176091	0.653696
					RPA2	ENSMAUG00000002825	-0.0986604	0.410127		RYR1	ENSMAUG00000016404	0.186414	0.183389
					RPL10A	ENSMAUG00000020124	-0.0854637	0.125959		RYR3	ENSMAUG00000021512	0.0553382	0.245014
					RPL17	ENSMAUG00000016494	-0.195263	0.754666		S1PR3	ENSMAUG00000013844	-0.145358	0.29711
					RPL18A	ENSMAUG00000008889	-0.0821717	0.235635		S1PR4	ENSMAUG00000008594	-0.261829	0.448874
					RPL19	ENSMAUG00000008307	-0.271774	0.0062675		SEC22B	ENSMAUG00000016258	-0.0226245	0.658337
					RPL22	ENSMAUG00000001047	-0.0900213	0.0488118		SKP1	ENSMAUG00000001139	0.028918	0.683628
					RPL23	ENSMAUG00000012907	-0.0492658	0.589573		SLC25A31	ENSMAUG00000012426	0.156335	0.543895
					RPL24	ENSMAUG00000013489	-0.0923413	0.12355		SLC8A1	ENSMAUG00000014024	0.169605	0.0440965
					RPL26	ENSMAUG00000009151	-0.533523	0.757791		SMAD1	ENSMAUG00000020113	0.0245319	0.69115
					RPL30	ENSMAUG00000006886	-0.0893338	0.246734		SMAD4	ENSMAUG00000009716	0.117029	0.108068
					RPL31	ENSMAUG00000010388	-0.146534	0.197446		SMO	ENSMAUG00000010178	0.169227	0.173165
					RPL32	ENSMAUG00000009858	-0.193184	0.0287874		SMURF1	ENSMAUG00000000511	0.119932	0.106993
					RPL34	ENSMAUG00000010445	-0.749165	0.326649		SNAP23	ENSMAUG00000011767	-0.0156682	0.869356
					RPL36A	ENSMAUG00000021261	-0.100247	0.196857		SNAP25	ENSMAUG00000021765	-0.0248912	0.581974
					RPL37	ENSMAUG00000015912	-0.31047	0.445295		SNAP29	ENSMAUG00000017470	-0.0708853	0.314013
					RPL37A	ENSMAUG00000020042	-0.139804	0.0702893		SNAP47	ENSMAUG00000020014	-0.0763374	0.244642
					RPL38	ENSMAUG00000010487	-0.226912	0.527785		SP1	ENSMAUG00000018418	0.105301	0.427815
					RPL39	ENSMAUG00000005925	-0.56037	0.263208		SSTR1	ENSMAUG00000001543	-0.142857	0.263577
					RPL6	ENSMAUG00000008637	-0.0696928	0.477324		SSTR2	ENSMAUG00000001118	-0.242179	0.00752996
					RPL7A	ENSMAUG00000016150	-0.0527419	0.288884		STK36	ENSMAUG00000009866	0.0957708	0.590895
					RPL9	ENSMAUG00000012459	-0.198984	0.323318		STX11	ENSMAUG00000002127	-2.48738	0.113835
					RPLP0	ENSMAUG00000000601	-0.0831243	0.616196		STX12	ENSMAUG00000016314	-0.014369	0.776132
					RPLP1	ENSMAUG00000001413	-1.61407	0.110394		STX16	ENSMAUG00000007705	-0.00447025	0.928857
					RPS12	ENSMAUG00000016653	-0.233504	0.0466952		STX18	ENSMAUG00000002981	-0.0425217	0.635173
					RPS15A	ENSMAUG00000016548	-0.146892	0.0217325		STX19	ENSMAUG00000004341	-0.246047	0.798536
					RPS16	ENSMAUG00000016611	-0.0518236	0.512156		STX1A	ENSMAUG00000022263	-0.130576	0.0132176
					RPS17	ENSMAUG00000017234	-0.134861	0.0482557		STX1B	ENSMAUG00000009390	-0.00558845	0.880462
					RPS28	ENSMAUG00000014417	-0.774413	0.0222009		STX2	ENSMAUG00000021340	0.0414118	0.601301
					RPS3	ENSMAUG00000006329	-0.784995	0.37755		STX3	ENSMAUG00000012305	0.0241784	0.732468
					RPS4X	ENSMAUG00000013223	-0.0586553	0.248166		STX4	ENSMAUG00000008526	-0.0176782	0.815224
					RPS5	ENSMAUG00000010731	-0.13394	0.0293305		STX5	ENSMAUG00000013701	-0.075005	0.237953
					RPS6	ENSMAUG00000014284	-0.0679655	0.58702		STX7	ENSMAUG00000021847	0.0140718	0.870512
					RPS9	ENSMAUG00000016938	-0.101755	0.0783585		STX8	ENSMAUG00000011000	-0.112461	0.19576
					RRM1	ENSMAUG00000010079	-0.10319	0.195268		SUFU	ENSMAUG00000017018	0.112348	0.104866
					RRM2	ENSMAUG00000016595	-0.162554	0.778164		TACR1	ENSMAUG00000016810	-0.116322	0.58256
					SARS1	ENSMAUG00000006723	-0.0567481	0.288775		TBXA2R	ENSMAUG00000015276	0.295288	0.0322272
					SARS2	ENSMAUG00000006702	-0.0307763	0.702943		TFDP1	ENSMAUG00000010456	0.0198659	0.777457
					SART1	ENSMAUG00000016274	-0.0218538	0.643159		TGFB1	ENSMAUG00000003854	0.025509	0.872686
					SEM1	ENSMAUG00000016213	-0.0487598	0.472125		TGFB2	ENSMAUG00000010097	0.0499012	0.491754
					SEPSECS	ENSMAUG00000002352	-0.0554688	0.67752		TGFBR1	ENSMAUG00000013435	0.072174	0.425818
					SF3A1	ENSMAUG00000020317	0.0145447	0.770488		TGFBR2	ENSMAUG00000002147	0.171056	0.0793375
					SF3A2	ENSMAUG00000005644	-0.0318672	0.576667		THBS2	ENSMAUG00000011839	0.164139	0.20353
					SF3A3	ENSMAUG00000013931	-0.0279118	0.762981		THBS3	ENSMAUG00000020310	0.0795398	0.357908
					SF3B1	ENSMAUG00000009071	0.0334094	0.356288		THRA	ENSMAUG00000009313	-0.109763	0.00602524
					SF3B2	ENSMAUG00000017040	-0.0844223	0.0999041		THRB	ENSMAUG00000008673	-0.172818	0.00434708
					SF3B3	ENSMAUG00000013618	-0.00204522	0.976616		TNF	ENSMAUG00000014299	0.13056	0.867892
					SF3B4	ENSMAUG00000015266	-0.0542689	0.439548		TNNC2	ENSMAUG00000010140	0.548691	0.405871
					SF3B5	ENSMAUG00000008283	-0.0826961	0.340275		TRPC1	ENSMAUG00000010246	0.151772	0.054506
					SLU7	ENSMAUG00000016739	-0.042431	0.455103		USE1	ENSMAUG00000001720	-0.0197307	0.796319
					SMUG1	ENSMAUG00000018792	-0.0774097	0.385055		VAMP1	ENSMAUG00000013113	0.0457406	0.28678
					SNRNP200	ENSMAUG00000011825	0.00783211	0.867552		VAMP2	ENSMAUG00000008839	-0.0287669	0.427132
					SNRNP27	ENSMAUG00000021913	-0.0465646	0.489976		VAMP3	ENSMAUG00000008784	0.0519408	0.484536
					SNRNP70	ENSMAUG00000020970	0.0327231	0.511532		VAMP4	ENSMAUG00000021533	-0.00775348	0.881635
					SNRPA	ENSMAUG00000008754	0.0327	0.6294		VAMP5	ENSMAUG00000010363	0.02806	0.907045
					SNRPA1	ENSMAUG00000015339	0.00823474	0.928513		VAMP7	ENSMAUG00000000133	0.0247631	0.701342
					SNRPB2	ENSMAUG00000006149	-0.097719	0.281544		VAMP8	ENSMAUG00000018469	0.00670573	0.9602
					SNRPD2	ENSMAUG00000018849	-0.181062	0.0223325		VTI1A	ENSMAUG00000011762	-0.0226262	0.714624
					SNRPD3	ENSMAUG00000021393	-0.122355	0.0510416		VTI1B	ENSMAUG00000000655	-0.102007	0.119028
					SNRPF	ENSMAUG00000008799	-0.632803	0.197535		WNT1	ENSMAUG00000012154	0.729308	0.244034
					SNU13	ENSMAUG00000010871	-0.0491369	0.426024		WNT10B	ENSMAUG00000012082	0.858147	0.10752
					SNW1	ENSMAUG00000016972	-0.0244051	0.726141		WNT16	ENSMAUG00000015173	0.66911	0.196459
					SRSF1	ENSMAUG00000021845	0.0314848	0.48023		WNT2	ENSMAUG00000012450	0.155526	0.234963
					SRSF2	ENSMAUG00000022242	0.0068262	0.920779		WNT3	ENSMAUG00000018292	0.678861	0.168358
					SRSF4	ENSMAUG00000021940	0.015064	0.807968		WNT3A	ENSMAUG00000021475	0.93693	0.217212
					SRSF5	ENSMAUG00000009544	0.00476154	0.917165		WNT5A	ENSMAUG00000014634	0.145619	0.386377
					SRSF6	ENSMAUG00000019086	0.0396152	0.552588		WNT6	ENSMAUG00000001585	0.444083	0.118338
					SRSF9	ENSMAUG00000011403	0.0312405	0.703803		WNT8B	ENSMAUG00000017837	0.389924	0.0564452
					SYF2	ENSMAUG00000018974	-0.186644	0.00683282		WNT9B	ENSMAUG00000017360	0.264929	0.603731
					TARS2	ENSMAUG00000008184	-0.020875	0.717823		ZFYVE9	ENSMAUG00000001289	0.0445171	0.426077
					TARS3	ENSMAUG00000015756	-0.11605	0.0864517		ZIC2	ENSMAUG00000013953	0.122435	0.620068
					TCERG1	ENSMAUG00000001246	0.00453847	0.932263
					THOC1	ENSMAUG00000010272	-0.0218931	0.750334
					THOC2	ENSMAUG00000002356	0.0238155	0.685952
					THOC3	ENSMAUG00000011225	-0.0632001	0.313322
					TXNL4A	ENSMAUG00000021849	-0.00916765	0.911036
					U2AF1	ENSMAUG00000020528	-0.0894389	0.176083
					U2AF2	ENSMAUG00000008180	-0.0144878	0.790276
					UBA52	ENSMAUG00000002775	-0.159722	0.00597127
					UNG	ENSMAUG00000011896	-0.2494	0.132242
					USP39	ENSMAUG00000009400	-0.0833213	0.286549
					VARS1	ENSMAUG00000006715	-0.0352738	0.57094
					VARS2	ENSMAUG00000018946	-0.102549	0.150232
					WARS2	ENSMAUG00000006394	-0.0823015	0.562672
					XAB2	ENSMAUG00000016507	-0.0189025	0.774881
					XRCC1	ENSMAUG00000020378	-0.0369359	0.561908
					YARS1	ENSMAUG00000021126	-0.0491635	0.452331
					YARS2	ENSMAUG00000012334	-0.104542	0.227857
					ZMAT2	ENSMAUG00000016579	0.0254953	0.628435
